# Supplementary material
Source: MDPI journal article supplement (https://www.mdpi.com/2311-553X/8/3/40)
Supplement: s1 [file s1]

# Supplementary Figures

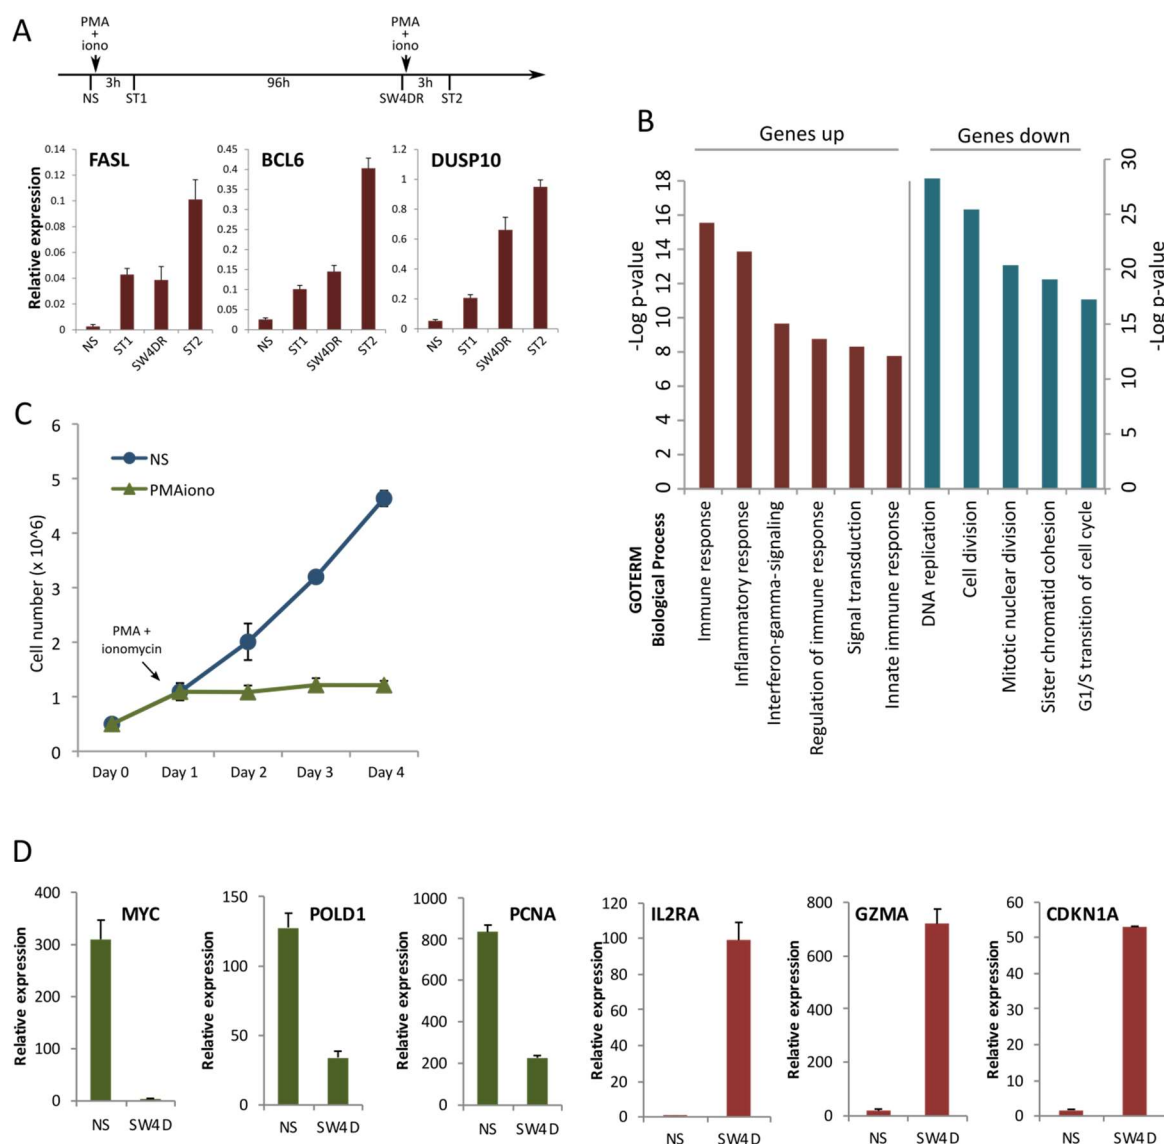

**Figure S1.** Gene expression analysis in Jurkat cells with a memory-like state, as in [25–27]. **(A)** RT-qPCR analysis of the indicated genes in non-stimulated Jurkat cells (NS), cells stimulated with PMA and ionomycin for 3 hours (ST1), cells stimulated as in ST1 and further grown for 4 days after stimulus withdrawal (SW4D) and SW4D cells stimulated a second time with PMA and ionomycin for 3 hours (ST2). GUSB was used as reference gene. **(B)** Gene ontology analysis of genes differentially expressed in the comparison of NS with SW4D Jurkat cells. The graph shows the significance of the enrichment of the indicated biological processes among both genes up-regulated and down-regulated in SW4D conditions. **(C)** Growth curve of Jurkat cells treated or not treated with a 3 hours pulse of PMA and ionomycin. Analysis has been performed in triplicate. **(D)** Analysis of the expression of the indicated genes in RNA-seq data of Jurkat cells left un-treated or stimulated with PMA/ionomycin for 3 hours and left untreated for 4 days after stimulus withdrawal (SW4D).

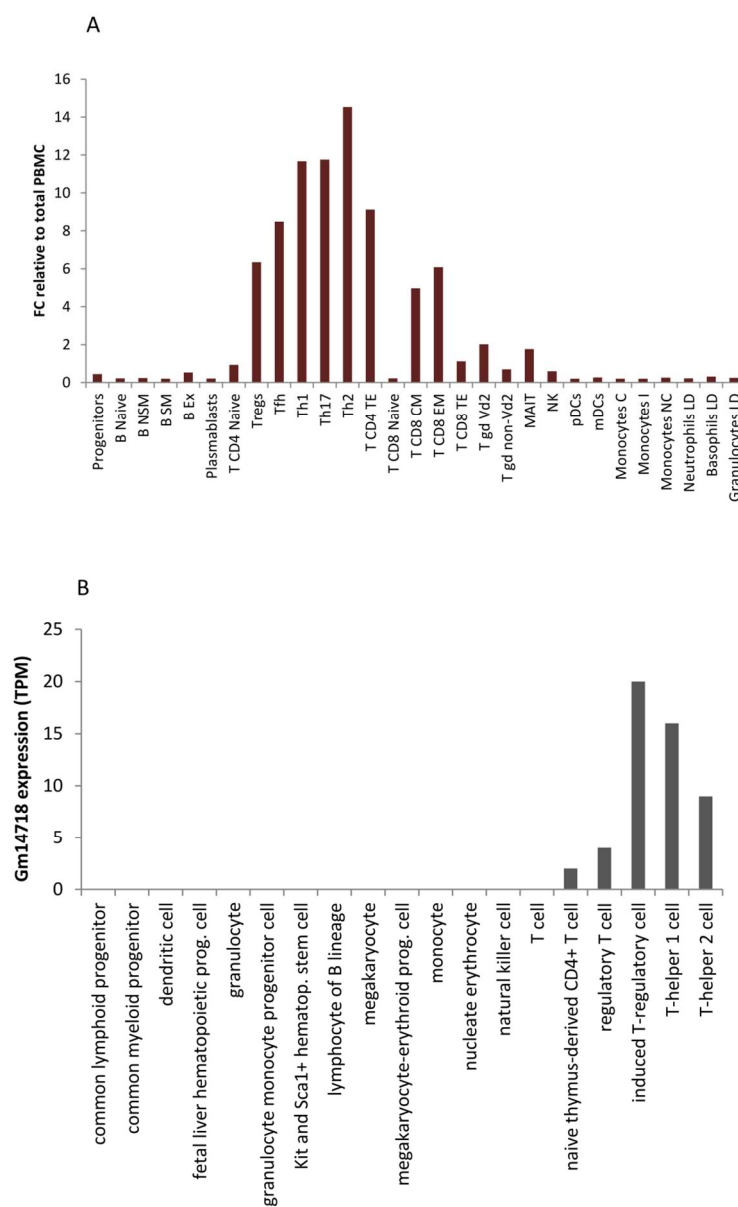

**Figure S2.** (A) Analysis of LINC00892 expression in data from Monaco et al. [30]. (B) Analysis of Gm14718 expression in different mononuclear cells derived from peripheral blood (PBMC) in data from the Expression Atlas (<https://www.ebi.ac.uk/gxa/home>).

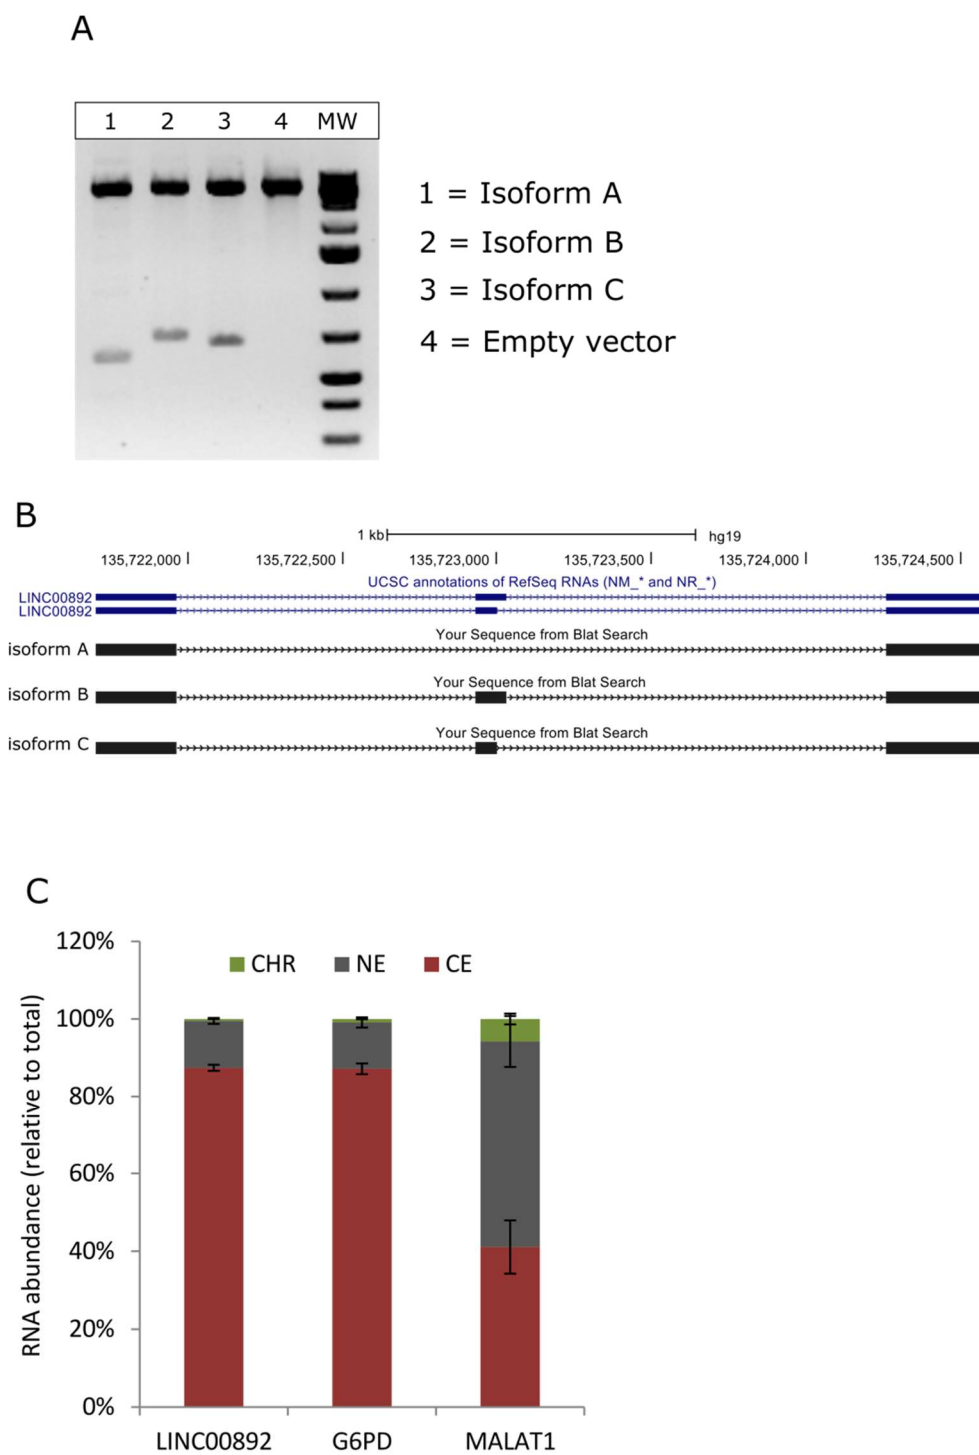

**Figure S3.** (A and B) PCR cloning of the LINC00892 cDNA from RNA extracted from a FL patient resulted in the identification of a novel isoform missing exon 2, as depicted in the gene graphic representation shown in panel B. (C) RT-qPCR analysis of RNA abundance in cellular fractions from Jurkat cells treated with PMA/ionomycin for 3 hours and collected 48 hours after stimulus wash. CHR is the chromatin fraction; NE is the nuclei enriched fraction and CE is the cytosolic fraction. Expression of G6PD is used as a marker for a typical cytosolic RNA and the expression of MALAT1 is used as a marker for a typical nuclear RNA. The experiment has been performed in quadruplicate.

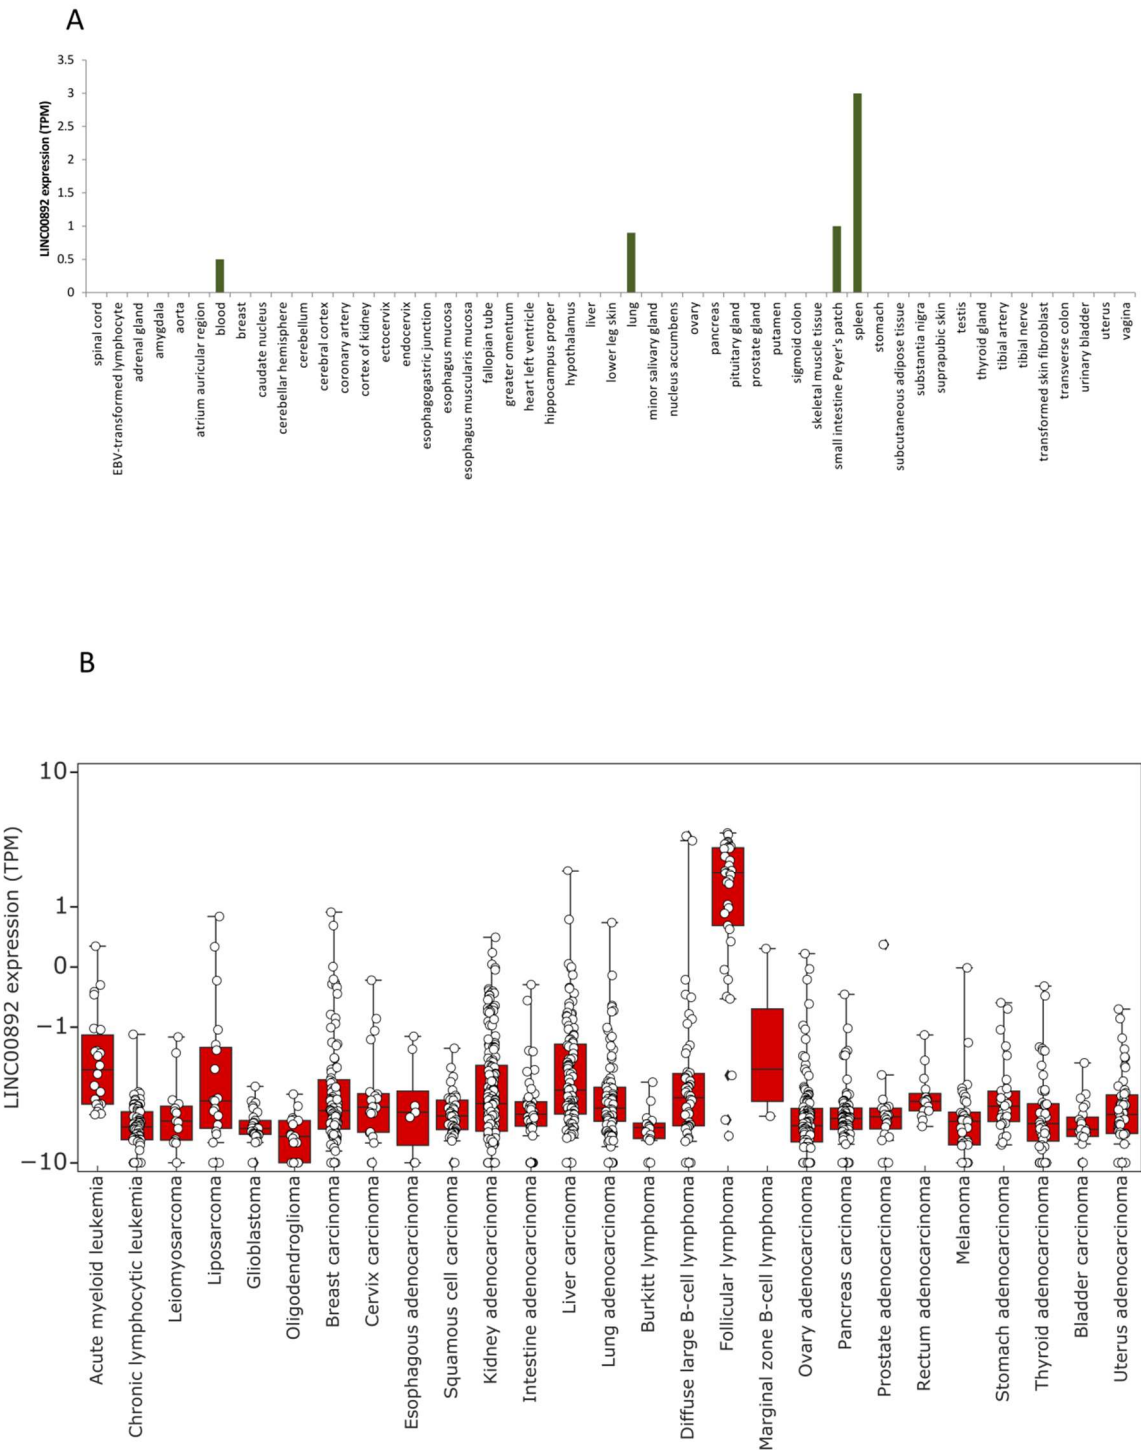

**Figure S4.** Analysis of LINC00892 expression in normal (A) and cancer (B) tissues. (A) Analysis of LINC00892 expression in data from the Genotype-Tissue Expression (GTEx) Project. (B) Analysis of LINC00892 expression in the pan cancer data produced from the International Cancer Genome Consortium (ICGC).

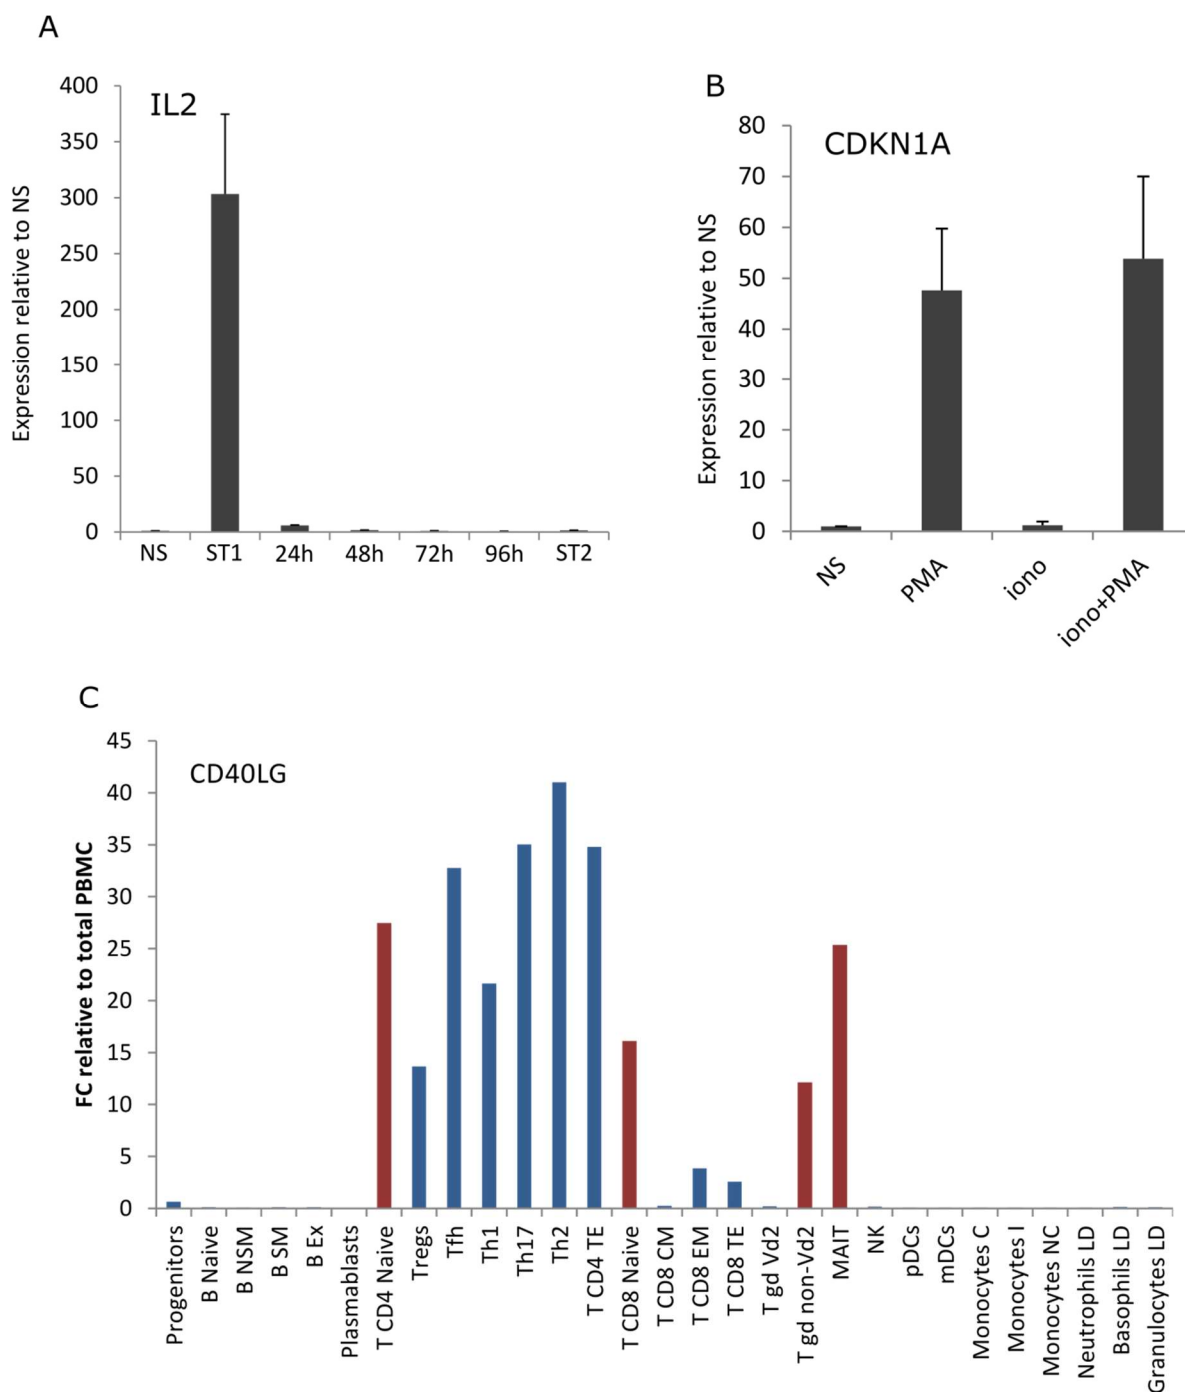

**Figure S5.** (A) RT-qPCR analysis of IL2 expression in Jurkat cells left untreated (NS), stimulated with PMA/ionomycin for 3 hours (ST1), washed and collected after the indicated hours after stimulation, and after a second 3 hours PMA/ionomycin stimulus (ST2). (B) RT-qPCR analysis of CDKN1A expression in Jurkat cells left untreated (NS), stimulated with PMA only, ionomycin only or both PMA and ionomycin for 3 hours and collected 4 days after the stimulus. (C) Analysis of CD40LG expression in data from Monaco et al. [30]. Cell types where the expression of CD40LG differs from that of LINC00892 are marked in red.

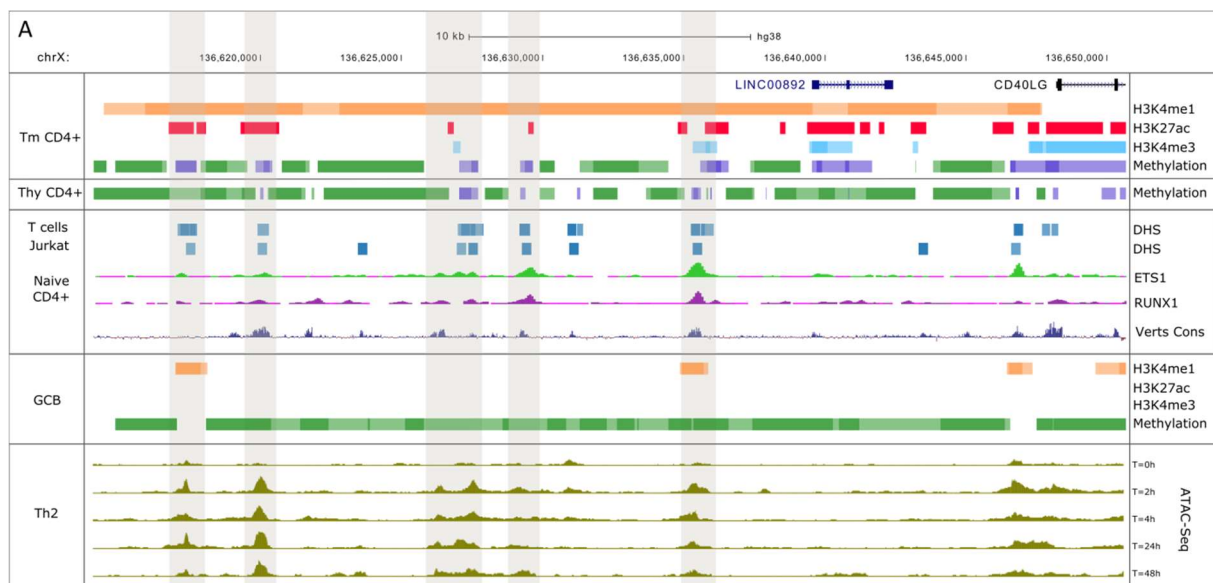

**Figure S6.** Epigenetic landscape of the genomic locus including LINC00892 and CD40LG. The figure display together publicly available data derived from different sources. On the right side the type of analysis is displayed, on the left the cell lines used for the analyses. Tm CD4+ are CD4+ memory T cells; Thy CD4+ stays for CD4+ thymocytes and GCB for germinal centre-derived B cells. Regions marked by the H3K4me1 histone modification are marked in orange. Regions marked by the H3K27ac histone modification are marked in red. Regions marked by the H3K4me3 histone modification are marked in azure. In the display of methylation data, hypermethylation is shown in green and hypomethylation in purple. ChIP-seq and methylation data are from the Blueprint Project. The figure also shows ATAC-Seq analysis in Th2 cells treated with CD3/CD28 at different time points [31]. (Shown are also the degree of sequence conservation among vertebrates (Verts cons), the presence of DNase hypersensitive sites (DHS) in either Jurkat or CD4+ T cells and the presence of binding sites for the transcription factors ETS1 and RUNX1 in Naive CD4+ T cells [41].

## Supplementary Methods

### Cloning of LINC00892

In order to be able to express the lncRNA transcript LINC00892 and possibly other lncRNAs, devoid of vector –derived sequences, we modified the mammalian expression vector pcDNA3.1 to remove most of the transcribed regions between the multicloning site and the transcription start site (TSS). The vector was modified by PCR using a forward primer located at the BGH-poly A site having an EcoRI and a BamHI sites in a 5' tail and a reverse primer located at the TSS with an EcoRI site in a 5' tail. The PCR product was ligated in order to create the pcDNA\_LNC vector having an EcoRI and a BamHI sites between the TSS and the poly-A site. Primer sequences are the following:

BGH-fw :CGGAATTCATAGGATCCTTTCTATATAAATGAGGAAATTGC

TSS\_rev: CGGAATTCTCTCTAGTTAGCCAGAGAGC

In order to clone the LINC00892 transcript in pcDNA\_LNC, we performed a reverse transcription reaction from total RNA extracted from an FL sample and used it in a PCR reaction with the following primers:

LINC00892\_fw: CGGAATTCAGATGCAGACATGGCTGGATGTTT

LINC00892\_rev: CGGGATCCTGATTTATGGGTTATTGTTTATTTTCC

The amplified PCR product has been gel extracted and purified using the Gel extraction Kit from Qiagen, digested with EcoRI and BamHI and cloned in pcDNA\_LNC also digested with the same enzymes. Single clones containing an insert have been expanded and the purified DNA has been Sanger sequenced.

### Nuclear/Cytoplasmic RNA fractionation

A confluent T75 Flask of Jurkat cells is treated with PMA 20ng/ml and ionomycin 500 ng/ml for 3 hours, washed twice with 10 ml full medium and let rest in the incubator for 3 days. Cells are collected by centrifugation and the pellet is washed once with PBS. Washed cells are pelleted, resuspended in 0.5 ml of Buffer A and left on ice for 10 min. After checking under the microscope that more than 90% of the cells are lysed, the cell suspension is centrifuged 10 min at 1000xg at 4 °C to pellet nuclei. The supernatant is transferred to a new tube and is kept as the cytosolic fraction. The nuclear pellet is resuspended in 0.5 ml of Buffer C and left on ice for 10 min. The chromatin fraction is pelleted by centrifugation 10 min at 14000 rpm at 4 °C and the supernatant is transferred in a new tube as nuclear fraction. RNA is extracted from 100 ul of nuclear and cytosolic fractions and from the entire chromatin pellet.

| Buffer A (hypotonic)          |        | Buffer C                      |
|-------------------------------|--------|-------------------------------|
| Hepes pH 8.0                  | 10 mM  | 150 mM NaCl                   |
| MgCl <sub>2</sub>             | 1.5 mM | 25 mM Tris pH 8.0             |
| NaCl                          | 10 mM  | 5 mM EDTA                     |
| DTT                           | 0.5 mM | 0.5 mM DTT                    |
| IGEPAL                        | 0.1%   | 0.5% IGEPAL                   |
| 1 x Complete™ (Roche)         |        | 1 x Complete™ (Roche)         |
| 100 U/ml SUPERase-In (Ambion) |        | 100 U/ml SUPERase-In (Ambion) |

## Supplementary Tables

**Table S1.** List of lncRNAs differentially regulated following treatment of Jurkat cells with PMA/ionomycin for 3 hours and collected 4 days after stimulus withdrawal (SW4D).

| Geneid          | gene_name      | logFC | NS 1 | NS 2 | NS 3 | SW4D 1 | SW4D 2 | SW4D 3 | P.Value   | adj.P.Val |
|-----------------|----------------|-------|------|------|------|--------|--------|--------|-----------|-----------|
| ENSG00000236039 | AC017060.1     | 9.30  | 0.00 | 0.15 | 0.19 | 98.40  | 114.62 | 105.24 | 0         | 0         |
| ENSG00000253138 | LINC00967      | 8.28  | 0.00 | 0.08 | 0.22 | 49.79  | 54.19  | 51.03  | 7.71E-219 | 1.78E-216 |
| ENSG00000204054 | LINC00963      | 7.45  | 0.07 | 0.05 | 0.03 | 10.76  | 10.46  | 10.53  | 1.78E-257 | 5.46E-255 |
| ENSG00000253490 | AC145110.1     | 7.39  | 0.00 | 0.00 | 0.00 | 5.34   | 5.90   | 5.93   | 1.25E-102 | 9.05E-101 |
| ENSG00000258871 | RP3-514A23.2   | 7.38  | 0.60 | 0.00 | 0.00 | 68.54  | 73.42  | 67.74  | 1.12E-127 | 1.10E-125 |
| ENSG00000226777 | FAM30A         | 6.97  | 0.59 | 0.90 | 0.72 | 88.32  | 81.59  | 89.20  | 0         | 0         |
| ENSG00000233093 | LINC00892      | 6.55  | 2.55 | 3.94 | 3.93 | 291.30 | 307.06 | 310.51 | 0         | 0         |
| ENSG00000253522 | MIR3142HG      | 6.54  | 0.59 | 1.00 | 1.40 | 92.37  | 84.70  | 88.37  | 0.00E+00  | 7.14E-306 |
| ENSG00000231346 | LINC01160      | 6.42  | 0.14 | 0.00 | 0.31 | 22.43  | 20.22  | 21.50  | 2.11E-91  | 1.31E-89  |
| ENSG00000227502 | LINC01268      | 6.30  | 0.00 | 0.06 | 0.00 | 6.54   | 7.03   | 6.12   | 1.45E-67  | 6.30E-66  |
| ENSG00000223552 | RP11-24F11.2   | 6.26  | 0.00 | 0.50 | 0.00 | 27.14  | 32.29  | 31.29  | 6.10E-71  | 2.79E-69  |
| ENSG00000251191 | LINC00589      | 6.20  | 0.00 | 0.00 | 0.00 | 6.31   | 6.81   | 6.88   | 2.40E-57  | 8.62E-56  |
| ENSG00000255201 | RP11-350N15.4  | 5.98  | 1.46 | 0.31 | 4.84 | 119.29 | 101.26 | 106.83 | 0.0018198 | 0.0092402 |
| ENSG00000256128 | LINC00944      | 5.98  | 0.00 | 0.00 | 0.00 | 5.09   | 7.51   | 6.76   | 3.68E-51  | 1.17E-49  |
| ENSG00000237372 | UNQ6494        | 5.78  | 0.00 | 0.00 | 0.00 | 3.62   | 4.48   | 4.62   | 4.55E-46  | 1.30E-44  |
| ENSG00000258623 | CTD-2325P2.3   | 5.72  | 0.00 | 0.00 | 0.00 | 23.73  | 20.13  | 20.63  | 7.75E-45  | 2.16E-43  |
| ENSG00000224184 | MIR3681HG      | 5.69  | 0.00 | 0.04 | 0.00 | 2.38   | 3.64   | 3.18   | 5.94E-49  | 1.80E-47  |
| ENSG00000227630 | LINC01132      | 5.62  | 0.00 | 0.61 | 0.45 | 11.31  | 12.45  | 11.34  | 0.0076697 | 0.0351906 |
| ENSG00000279082 | RP1-167O22.1   | 5.50  | 0.27 | 0.15 | 0.00 | 6.99   | 10.55  | 8.33   | 5.26E-62  | 2.08E-60  |
| ENSG00000226088 | RP11-180O5.2   | 5.37  | 0.68 | 0.57 | 1.50 | 42.90  | 46.67  | 48.10  | 4.74E-75  | 2.30E-73  |
| ENSG00000271959 | CTD-3064M3.7   | 5.23  | 0.00 | 0.00 | 0.00 | 3.11   | 1.91   | 2.19   | 2.00E-34  | 4.40E-33  |
| ENSG00000232895 | RP4-543J13.1   | 5.22  | 1.18 | 0.99 | 0.65 | 50.39  | 52.26  | 55.33  | 1.77E-57  | 6.41E-56  |
| ENSG00000227733 | RP4-565E6.1    | 5.19  | 0.02 | 0.06 | 0.06 | 2.07   | 1.85   | 2.53   | 1.59E-65  | 6.71E-64  |
| ENSG00000256732 | RP11-407A16.3  | 5.17  | 0.98 | 2.07 | 1.63 | 53.62  | 56.70  | 54.75  | 3.69E-128 | 3.66E-126 |
| ENSG00000261504 | RP11-317P15.4  | 5.14  | 0.00 | 0.00 | 0.00 | 4.05   | 4.40   | 5.97   | 1.02E-32  | 2.15E-31  |
| ENSG00000246363 | RP11-13A1.1    | 5.14  | 0.00 | 0.00 | 0.00 | 2.04   | 2.20   | 2.42   | 1.09E-32  | 2.29E-31  |
| ENSG00000276778 | RP11-524N5.1   | 5.14  | 0.00 | 0.00 | 0.00 | 1.77   | 2.05   | 1.44   | 1.16E-32  | 2.44E-31  |
| ENSG00000236230 | RP11-400N13.1  | 5.11  | 0.00 | 0.00 | 0.00 | 7.94   | 10.76  | 9.92   | 3.28E-32  | 6.79E-31  |
| ENSG00000251443 | RP11-113I22.1  | 5.06  | 0.00 | 0.00 | 0.00 | 11.20  | 11.71  | 12.96  | 2.40E-31  | 4.87E-30  |
| ENSG00000254734 | CTD-3138F19.1  | 5.00  | 0.34 | 0.86 | 1.12 | 33.14  | 25.57  | 36.39  | 1.65E-56  | 5.82E-55  |
| ENSG00000258694 | RP11-1033H12.1 | 4.92  | 2.24 | 0.00 | 1.85 | 44.25  | 39.89  | 48.92  | 7.69E-50  | 2.37E-48  |
| ENSG00000224950 | RP5-1086K13.1  | 4.78  | 1.02 | 0.79 | 1.22 | 31.68  | 22.35  | 28.35  | 4.20E-116 | 3.61E-114 |
| ENSG00000230105 | RP11-431N15.2  | 4.77  | 0.27 | 0.46 | 0.00 | 10.53  | 12.73  | 13.94  | 1.12E-35  | 2.54E-34  |
| ENSG00000257242 | LINC01619      | 4.69  | 0.00 | 0.05 | 0.06 | 2.06   | 2.38   | 1.66   | 7.95E-32  | 1.63E-30  |
| ENSG00000238178 | RP11-431J24.2  | 4.65  | 0.00 | 0.13 | 0.00 | 5.28   | 3.97   | 4.61   | 2.33E-27  | 4.18E-26  |
| ENSG00000261158 | CTD-2583P5.3   | 4.62  | 0.00 | 0.00 | 0.00 | 2.55   | 6.75   | 6.53   | 1.93E-24  | 3.15E-23  |
| ENSG00000257023 | RP11-268P4.4   | 4.58  | 0.23 | 0.19 | 0.75 | 12.94  | 14.51  | 10.53  | 1.64E-38  | 4.01E-37  |
| ENSG00000238164 | RP3-395M20.8   | 4.55  | 0.54 | 0.38 | 0.67 | 12.30  | 9.99   | 13.31  | 1.63E-121 | 1.49E-119 |
| ENSG00000258867 | LINC01146      | 4.54  | 0.14 | 0.00 | 0.23 | 3.44   | 3.38   | 3.77   | 2.93E-36  | 6.75E-35  |
| ENSG00000259150 | LINC00929      | 4.51  | 0.00 | 0.00 | 0.00 | 1.51   | 3.04   | 1.95   | 6.46E-23  | 1.01E-21  |



|                 |                |      |       |       |       |        |        |        |           |           |
|-----------------|----------------|------|-------|-------|-------|--------|--------|--------|-----------|-----------|
| ENSG00000267551 | AC005264.2     | 4.41 | 0.17  | 0.21  | 0.09  | 6.29   | 4.09   | 3.91   | 5.08E-37  | 1.20E-35  |
| ENSG00000178977 | LINC00324      | 4.37 | 1.13  | 1.90  | 1.34  | 27.40  | 30.43  | 28.85  | 6.16E-104 | 4.51E-102 |
| ENSG00000274021 | RP11-823E8.3   | 4.33 | 0.00  | 0.07  | 0.10  | 2.00   | 2.50   | 3.16   | 1.44E-25  | 2.45E-24  |
| ENSG00000227517 | LINC01483      | 4.25 | 0.00  | 0.00  | 0.00  | 0.82   | 1.02   | 0.67   | 9.22E-20  | 1.28E-18  |
| ENSG00000248964 | RP11-94H18.1   | 4.23 | 0.00  | 0.00  | 0.00  | 1.34   | 1.95   | 1.67   | 1.68E-19  | 2.33E-18  |
| ENSG00000259719 | RP11-930O11.1  | 4.22 | 0.00  | 0.00  | 0.00  | 2.79   | 6.68   | 3.32   | 2.39E-19  | 3.29E-18  |
| ENSG00000256995 | RP11-114G22.1  | 4.20 | 0.00  | 0.00  | 0.00  | 0.79   | 0.56   | 0.52   | 3.65E-19  | 4.99E-18  |
| ENSG00000274536 | MIR223         | 4.20 | 8.62  | 14.58 | 16.97 | 238.23 | 208.66 | 211.45 | 3.43E-243 | 9.76E-241 |
| ENSG00000244620 | AL122127.25    | 4.18 | 0.81  | 0.68  | 0.44  | 16.80  | 15.39  | 20.05  | 2.06E-30  | 4.08E-29  |
| ENSG00000245904 | RP11-796E2.4   | 4.11 | 0.08  | 0.04  | 0.09  | 1.75   | 1.33   | 1.37   | 3.86E-35  | 8.65E-34  |
| ENSG00000253300 | RP11-108E14.1  | 4.10 | 0.00  | 0.00  | 0.00  | 2.42   | 2.80   | 2.81   | 5.07E-18  | 6.62E-17  |
| ENSG00000237311 | RP6-159A1.3    | 4.06 | 0.00  | 0.00  | 0.00  | 2.50   | 3.53   | 4.79   | 1.30E-17  | 1.66E-16  |
| ENSG00000238107 | RP11-495P10.5  | 4.05 | 0.20  | 0.17  | 0.11  | 4.03   | 3.89   | 4.06   | 6.29E-28  | 1.15E-26  |
| ENSG00000224376 | AC017104.6     | 4.00 | 0.61  | 0.10  | 0.13  | 5.64   | 5.43   | 4.47   | 1.24E-28  | 2.32E-27  |
| ENSG00000205890 | RP11-473M20.5  | 3.99 | 0.13  | 0.16  | 0.21  | 5.04   | 2.18   | 3.32   | 3.42E-32  | 7.07E-31  |
| ENSG00000237224 | RP11-109A6.2   | 3.99 | 0.00  | 0.00  | 0.09  | 1.74   | 2.06   | 1.01   | 9.75E-19  | 1.31E-17  |
| ENSG00000240770 | C21orf91-OT1   | 3.96 | 0.20  | 0.33  | 0.00  | 5.37   | 4.45   | 4.98   | 1.68E-21  | 2.51E-20  |
| ENSG00000189238 | LINC00943      | 3.94 | 0.00  | 0.00  | 0.00  | 0.99   | 0.52   | 0.67   | 2.47E-16  | 3.01E-15  |
| ENSG00000258987 | RP11-131H24.4  | 3.94 | 0.00  | 0.30  | 0.39  | 8.92   | 7.30   | 7.03   | 6.11E-20  | 8.57E-19  |
| ENSG00000271725 | RP11-761I4.4   | 3.91 | 0.41  | 0.35  | 0.45  | 11.26  | 13.56  | 9.08   | 4.34E-22  | 6.61E-21  |
| ENSG00000234377 | RNF219-AS1     | 3.90 | 0.02  | 0.13  | 0.05  | 1.10   | 0.99   | 1.13   | 5.00E-30  | 9.80E-29  |
| ENSG00000237596 | RP13-143G15.4  | 3.88 | 0.00  | 0.02  | 0.03  | 0.68   | 0.67   | 0.53   | 2.77E-19  | 3.80E-18  |
| ENSG00000257495 | KRT73-AS1      | 3.88 | 0.00  | 0.32  | 0.16  | 2.10   | 1.77   | 2.32   | 1.14E-26  | 2.00E-25  |
| ENSG00000232679 | RP11-400N13.3  | 3.86 | 0.00  | 0.00  | 0.00  | 5.34   | 4.67   | 3.85   | 1.46E-15  | 1.72E-14  |
| ENSG00000226673 | LINC01108      | 3.86 | 0.05  | 0.00  | 0.00  | 0.81   | 0.87   | 0.99   | 2.89E-17  | 3.66E-16  |
| ENSG00000227039 | ITGB2-AS1      | 3.85 | 8.34  | 15.38 | 16.60 | 186.33 | 153.02 | 177.80 | 1.34E-40  | 3.42E-39  |
| ENSG00000250696 | RP11-704M14.1  | 3.85 | 0.00  | 0.00  | 0.00  | 0.99   | 0.60   | 1.00   | 1.91E-15  | 2.24E-14  |
| ENSG00000260641 | RP11-1299A16.3 | 3.81 | 0.07  | 0.20  | 0.27  | 2.58   | 2.36   | 2.56   | 6.98E-37  | 1.64E-35  |
| ENSG00000266968 | RP11-116O18.1  | 3.80 | 0.00  | 0.00  | 0.00  | 0.96   | 1.24   | 2.18   | 5.10E-15  | 5.89E-14  |
| ENSG00000224413 | AP001476.2     | 3.63 | 0.00  | 0.00  | 0.00  | 0.98   | 0.92   | 1.08   | 1.53E-13  | 1.65E-12  |
| ENSG00000276476 | LINC00540      | 3.63 | 0.00  | 0.06  | 0.00  | 1.10   | 0.89   | 0.95   | 1.32E-14  | 1.50E-13  |
| ENSG00000272720 | CTA-228A9.3    | 3.62 | 1.50  | 1.38  | 1.65  | 19.16  | 19.01  | 17.49  | 4.47E-51  | 1.42E-49  |
| ENSG00000246526 | RP11-539L10.2  | 3.62 | 0.97  | 0.90  | 1.18  | 13.31  | 13.19  | 11.39  | 1.09E-46  | 3.17E-45  |
| ENSG00000224228 | RP1-15D23.2    | 3.62 | 0.00  | 0.20  | 0.80  | 4.78   | 6.24   | 5.08   | 3.54E-18  | 4.66E-17  |
| ENSG00000226822 | RP11-356N1.2   | 3.61 | 0.05  | 0.00  | 0.00  | 0.69   | 0.54   | 1.05   | 1.16E-14  | 1.32E-13  |
| ENSG00000258875 | CTD-2547L24.3  | 3.53 | 2.25  | 4.29  | 3.82  | 35.82  | 34.75  | 38.35  | 7.28E-90  | 4.41E-88  |
| ENSG00000226067 | LINC00623      | 3.48 | 0.47  | 0.55  | 0.83  | 8.06   | 6.51   | 6.87   | 3.14E-34  | 6.87E-33  |
| ENSG00000250155 | CTD-2353F22.1  | 3.47 | 0.34  | 0.28  | 0.00  | 4.26   | 2.44   | 3.92   | 1.15E-16  | 1.42E-15  |
| ENSG00000253177 | RP11-100L22.1  | 3.47 | 0.00  | 0.00  | 0.00  | 1.48   | 2.39   | 1.92   | 3.24E-12  | 3.26E-11  |
| ENSG00000227070 | RP11-191G24.1  | 3.44 | 0.00  | 0.00  | 0.00  | 4.06   | 5.51   | 2.72   | 5.49E-12  | 5.47E-11  |
| ENSG00000227719 | AC006042.6     | 3.43 | 0.00  | 0.00  | 0.41  | 6.96   | 5.39   | 2.47   | 4.87E-13  | 5.13E-12  |
| ENSG00000271992 | RP11-42O15.3   | 3.41 | 2.52  | 1.06  | 0.92  | 21.17  | 16.02  | 15.77  | 9.20E-24  | 1.47E-22  |
| ENSG00000229646 | RP11-330A16.1  | 3.40 | 76.35 | 45.05 | 54.57 | 552.36 | 579.04 | 568.36 | 8.10E-96  | 5.38E-94  |
| ENSG00000250166 | RP11-268P4.5   | 3.39 | 0.00  | 0.38  | 0.00  | 5.00   | 4.70   | 6.04   | 1.51E-12  | 1.55E-11  |
| ENSG00000279110 | CTA-243E7.1    | 3.36 | 0.03  | 0.09  | 0.02  | 0.36   | 0.46   | 0.71   | 1.67E-20  | 2.39E-19  |
| ENSG00000204282 | TNRC6C-AS1     | 3.35 | 3.42  | 5.79  | 6.07  | 46.14  | 45.47  | 48.60  | 3.84E-167 | 5.60E-165 |
| ENSG00000266709 | RP11-214O1.2   | 3.33 | 1.42  | 2.09  | 1.04  | 15.71  | 12.58  | 15.70  | 1.30E-43  | 3.52E-42  |
| ENSG00000260467 | RP11-405F3.4   | 3.32 | 1.70  | 1.23  | 2.41  | 17.61  | 17.57  | 18.55  | 8.07E-32  | 1.65E-30  |
| ENSG00000275418 | RP11-126O1.6   | 3.32 | 0.00  | 0.00  | 0.00  | 5.17   | 6.48   | 9.55   | 4.63E-11  | 4.39E-10  |
| ENSG00000259881 | RP11-830F9.5   | 3.31 | 1.54  | 1.13  | 0.77  | 12.56  | 8.98   | 10.74  | 4.58E-52  | 1.49E-50  |
| ENSG00000267034 | RP11-384O8.1   | 3.31 | 0.28  | 0.00  | 0.15  | 2.13   | 2.29   | 2.45   | 3.48E-14  | 3.88E-13  |
| ENSG00000260182 | RP11-616M22.5  | 3.27 | 0.79  | 0.00  | 1.73  | 12.92  | 13.78  | 11.28  | 7.75E-14  | 8.48E-13  |
| ENSG00000276691 | RP5-1057I20.5  | 3.26 | 1.79  | 1.81  | 1.58  | 19.25  | 17.74  | 17.41  | 4.24E-25  | 7.06E-24  |

|                 |                |      |      |      |       |       |       |       |           |           |
|-----------------|----------------|------|------|------|-------|-------|-------|-------|-----------|-----------|
| ENSG00000272079 | LA16c-380H5.5  | 3.24 | 0.15 | 0.39 | 0.51  | 3.38  | 5.41  | 3.75  | 1.56E-17  | 2.00E-16  |
| ENSG00000273812 | WI2-87327B8.2  | 3.22 | 0.31 | 0.26 | 0.00  | 3.77  | 3.55  | 4.84  | 2.80E-12  | 2.83E-11  |
| ENSG00000240535 | CTD-2313F11.1  | 3.21 | 0.00 | 0.08 | 0.10  | 0.88  | 0.68  | 0.84  | 8.04E-14  | 8.80E-13  |
| ENSG00000244676 | AL109761.5     | 3.20 | 0.00 | 0.00 | 0.47  | 5.67  | 4.00  | 3.81  | 3.72E-11  | 3.54E-10  |
| ENSG00000274020 | LINC01138      | 3.17 | 0.60 | 0.79 | 0.87  | 6.70  | 5.74  | 7.35  | 7.41E-43  | 1.97E-41  |
| ENSG00000228863 | RP11-404F10.2  | 3.16 | 0.05 | 0.20 | 0.26  | 1.51  | 1.32  | 1.89  | 5.54E-19  | 7.53E-18  |
| ENSG00000274737 | RP5-1057I20.6  | 3.15 | 0.38 | 0.32 | 0.42  | 7.48  | 5.08  | 5.44  | 5.00E-13  | 5.25E-12  |
| ENSG00000277851 | RP11-756G20.1  | 3.15 | 0.73 | 1.44 | 0.81  | 10.99 | 7.57  | 10.80 | 6.24E-21  | 9.07E-20  |
| ENSG00000267121 | CTD-2020K17.1  | 3.15 | 6.42 | 7.47 | 8.51  | 63.38 | 56.75 | 62.17 | 2.94E-164 | 4.18E-162 |
| ENSG00000267414 | RP11-456K23.1  | 3.12 | 0.19 | 0.08 | 0.10  | 1.66  | 1.27  | 2.20  | 1.29E-13  | 1.39E-12  |
| ENSG00000265179 | RP11-672L10.2  | 3.11 | 0.10 | 0.13 | 0.17  | 1.65  | 0.98  | 1.66  | 4.67E-17  | 5.87E-16  |
| ENSG00000261644 | RP11-327F22.1  | 3.10 | 0.00 | 0.14 | 0.06  | 0.88  | 0.77  | 0.89  | 2.02E-12  | 2.05E-11  |
| ENSG00000226330 | RP11-739N20.2  | 3.07 | 0.00 | 0.68 | 0.89  | 7.94  | 4.57  | 6.22  | 1.87E-12  | 1.91E-11  |
| ENSG00000235831 | BHLHE40-AS1    | 3.00 | 1.15 | 1.88 | 1.27  | 10.58 | 9.88  | 12.09 | 3.22E-43  | 8.65E-42  |
| ENSG00000237346 | RP3-448I9.2    | 3.00 | 5.20 | 2.69 | 3.08  | 26.32 | 32.18 | 27.84 | 1.03E-27  | 1.88E-26  |
| ENSG00000277324 | RP11-850A17.1  | 3.00 | 0.00 | 0.10 | 0.00  | 0.64  | 1.44  | 1.03  | 1.34E-09  | 1.17E-08  |
| ENSG00000258136 | RP11-864J10.4  | 2.99 | 0.91 | 0.48 | 0.63  | 5.51  | 5.77  | 5.42  | 4.00E-22  | 6.08E-21  |
| ENSG00000240527 | RP11-429G19.3  | 2.99 | 6.33 | 8.68 | 9.17  | 56.27 | 65.65 | 59.64 | 3.08E-48  | 9.23E-47  |
| ENSG00000266445 | RP13-991F5.2   | 2.98 | 0.23 | 0.00 | 0.26  | 4.10  | 1.69  | 2.58  | 1.40E-10  | 1.29E-09  |
| ENSG00000224093 | RP5-1033H22.2  | 2.96 | 0.00 | 0.00 | 0.11  | 1.21  | 0.41  | 1.22  | 1.79E-09  | 1.55E-08  |
| ENSG00000237928 | NFIA-AS2       | 2.95 | 0.64 | 0.80 | 0.23  | 3.61  | 5.15  | 4.34  | 1.10E-19  | 1.52E-18  |
| ENSG00000260796 | RP11-1348G14.5 | 2.95 | 0.36 | 0.00 | 0.00  | 3.57  | 2.24  | 3.60  | 2.24E-09  | 1.92E-08  |
| ENSG00000230400 | RP11-359G22.2  | 2.94 | 0.18 | 0.42 | 0.25  | 1.83  | 2.14  | 2.64  | 1.61E-21  | 2.40E-20  |
| ENSG00000278730 | RP11-147L13.11 | 2.93 | 0.07 | 0.00 | 0.07  | 0.95  | 0.76  | 0.52  | 3.55E-10  | 3.20E-09  |
| ENSG00000236345 | RP11-59D5__B.2 | 2.91 | 0.81 | 0.45 | 0.44  | 3.98  | 5.69  | 4.46  | 1.13E-17  | 1.46E-16  |
| ENSG00000227706 | RP11-301G19.1  | 2.91 | 1.46 | 6.04 | 6.71  | 29.40 | 28.28 | 25.99 | 0.0101908 | 0.0456472 |
| ENSG00000270959 | LPP-AS2        | 2.90 | 0.89 | 1.27 | 1.06  | 7.37  | 7.99  | 7.80  | 1.03E-34  | 2.27E-33  |
| ENSG00000260273 | RP11-425D10.10 | 2.90 | 1.12 | 1.51 | 0.00  | 6.39  | 5.55  | 4.71  | 4.32E-14  | 4.80E-13  |
| ENSG00000240710 | RP11-430C7.4   | 2.89 | 0.57 | 0.24 | 0.63  | 5.65  | 4.73  | 4.43  | 3.35E-12  | 3.37E-11  |
| ENSG00000227676 | LINC01068      | 2.87 | 0.00 | 0.23 | 0.00  | 0.89  | 4.46  | 2.09  | 8.95E-09  | 7.38E-08  |
| ENSG00000231105 | RP5-1071N3.1   | 2.87 | 0.08 | 0.53 | 0.61  | 2.77  | 2.28  | 2.96  | 4.62E-17  | 5.81E-16  |
| ENSG00000223387 | RP11-408H1.3   | 2.86 | 0.05 | 0.00 | 0.12  | 0.64  | 0.55  | 0.71  | 3.26E-10  | 2.96E-09  |
| ENSG00000260239 | RP11-274H24.1  | 2.85 | 0.00 | 0.43 | 0.28  | 1.51  | 1.42  | 2.00  | 1.48E-12  | 1.52E-11  |
| ENSG00000273174 | RP11-434H6.6   | 2.85 | 4.15 | 5.82 | 4.95  | 31.51 | 32.85 | 40.16 | 1.52E-31  | 3.10E-30  |
| ENSG00000226688 | ENTPD1-AS1     | 2.84 | 1.01 | 1.54 | 1.20  | 7.41  | 8.71  | 8.50  | 3.29E-87  | 1.92E-85  |
| ENSG00000236751 | LINC01186      | 2.83 | 0.00 | 0.00 | 0.69  | 2.74  | 3.87  | 2.07  | 4.57E-09  | 3.84E-08  |
| ENSG00000250274 | CTB-114C7.4    | 2.82 | 0.09 | 0.00 | 0.00  | 1.08  | 0.37  | 0.79  | 1.44E-08  | 1.17E-07  |
| ENSG00000242759 | LINC00882      | 2.82 | 0.76 | 0.30 | 0.55  | 3.70  | 3.95  | 3.06  | 2.77E-25  | 4.67E-24  |
| ENSG00000258181 | RP11-493L12.4  | 2.82 | 0.00 | 0.64 | 0.84  | 5.89  | 5.54  | 3.39  | 2.84E-10  | 2.58E-09  |
| ENSG00000254887 | CTC-378H22.1   | 2.78 | 0.22 | 0.55 | 0.48  | 3.83  | 3.37  | 4.10  | 1.13E-11  | 1.11E-10  |
| ENSG00000235492 | LINC01221      | 2.78 | 4.14 | 3.23 | 2.60  | 23.65 | 20.42 | 22.85 | 7.91E-26  | 1.35E-24  |
| ENSG00000235304 | LINC01281      | 2.77 | 0.00 | 0.19 | 0.00  | 0.73  | 1.02  | 0.98  | 1.54E-08  | 1.25E-07  |
| ENSG00000233791 | LINC01136      | 2.77 | 0.22 | 0.42 | 0.47  | 2.91  | 2.81  | 2.22  | 3.79E-17  | 4.77E-16  |
| ENSG00000250739 | LINC01262      | 2.75 | 0.00 | 0.00 | 0.49  | 0.98  | 2.98  | 2.21  | 1.47E-08  | 1.19E-07  |
| ENSG00000251301 | RP11-81H14.2   | 2.75 | 0.22 | 0.43 | 0.16  | 2.15  | 1.80  | 1.92  | 2.39E-14  | 2.69E-13  |
| ENSG00000253395 | KB-1460A1.1    | 2.73 | 0.45 | 0.38 | 0.50  | 2.99  | 7.04  | 6.53  | 1.73E-09  | 1.49E-08  |
| ENSG00000251364 | CTD-2516F10.2  | 2.70 | 0.72 | 0.65 | 0.86  | 4.53  | 4.90  | 4.27  | 1.67E-40  | 4.25E-39  |
| ENSG00000232533 | AC093673.5     | 2.69 | 9.66 | 8.37 | 13.29 | 66.86 | 57.29 | 63.69 | 1.37E-45  | 3.87E-44  |
| ENSG00000260619 | RP11-775C24.3  | 2.69 | 0.00 | 0.47 | 0.00  | 0.96  | 0.74  | 0.88  | 4.48E-09  | 3.77E-08  |
| ENSG00000237914 | SIRPG-AS1      | 2.69 | 0.07 | 0.06 | 0.22  | 0.87  | 1.43  | 0.66  | 3.23E-10  | 2.93E-09  |
| ENSG00000226648 | PLCG1-AS1      | 2.68 | 1.74 | 1.01 | 1.77  | 8.66  | 10.07 | 9.31  | 1.43E-23  | 2.27E-22  |
| ENSG00000186056 | MATN1-AS1      | 2.68 | 0.53 | 0.29 | 0.54  | 2.66  | 2.86  | 2.95  | 3.61E-21  | 5.31E-20  |
| ENSG00000266389 | CTB-41I6.1     | 2.66 | 1.95 | 6.14 | 4.82  | 22.94 | 23.09 | 30.64 | 9.80E-20  | 1.36E-18  |
| ENSG00000235890 | TSPEAR-AS1     | 2.66 | 7.06 | 6.42 | 7.22  | 48.45 | 35.38 | 38.72 | 2.19E-76  | 1.08E-74  |

|                 |                |      |       |       |       |        |       |       |          |           |
|-----------------|----------------|------|-------|-------|-------|--------|-------|-------|----------|-----------|
| ENSG00000278829 | RP11-358B23.7  | 2.65 | 1.43  | 0.80  | 0.79  | 8.38   | 5.91  | 6.60  | 2.99E-14 | 3.35E-13  |
| ENSG00000239636 | RP4-728D4.2    | 2.65 | 3.42  | 5.91  | 7.73  | 31.03  | 28.21 | 37.97 | 1.65E-39 | 4.09E-38  |
| ENSG00000262580 | RP11-334C17.5  | 2.64 | 1.34  | 1.32  | 1.60  | 9.34   | 6.85  | 8.86  | 1.16E-45 | 3.28E-44  |
| ENSG00000245888 | FLJ21408       | 2.63 | 0.12  | 0.35  | 0.20  | 1.58   | 1.36  | 1.52  | 5.10E-13 | 5.36E-12  |
| ENSG00000235586 | AC011247.3     | 2.63 | 0.00  | 2.12  | 0.92  | 17.49  | 4.33  | 8.35  | 1.07E-08 | 8.79E-08  |
| ENSG00000248360 | LINC00504      | 2.62 | 0.00  | 0.26  | 0.13  | 0.42   | 0.79  | 0.89  | 8.03E-11 | 7.50E-10  |
| ENSG00000226699 | RP11-122K13.7  | 2.61 | 4.25  | 1.79  | 0.00  | 13.99  | 9.87  | 18.79 | 1.84E-09 | 1.59E-08  |
| ENSG00000231441 | RP11-472M19.2  | 2.61 | 0.71  | 0.00  | 1.56  | 5.06   | 4.76  | 4.71  | 1.16E-09 | 1.01E-08  |
| ENSG00000269843 | CTC-490E21.10  | 2.61 | 1.62  | 0.34  | 0.00  | 7.12   | 2.09  | 6.28  | 6.30E-09 | 5.25E-08  |
| ENSG00000232352 | SEMA3B-AS1     | 2.59 | 0.00  | 1.46  | 1.91  | 5.71   | 9.55  | 7.67  | 2.29E-09 | 1.96E-08  |
| ENSG00000230454 | U73166.2       | 2.59 | 0.60  | 0.50  | 1.07  | 4.82   | 3.54  | 4.20  | 9.39E-20 | 1.31E-18  |
| ENSG00000260409 | RP11-403B2.7   | 2.58 | 0.49  | 0.21  | 0.54  | 2.28   | 3.15  | 2.83  | 4.54E-12 | 4.54E-11  |
| ENSG00000266171 | RP11-769O8.1   | 2.55 | 0.34  | 0.10  | 0.38  | 2.25   | 1.65  | 1.77  | 3.32E-10 | 3.00E-09  |
| ENSG00000273151 | RP11-449P15.2  | 2.53 | 1.33  | 1.00  | 1.50  | 7.52   | 6.45  | 6.56  | 1.89E-45 | 5.32E-44  |
| ENSG00000228382 | ITPKB-IT1      | 2.53 | 0.67  | 0.94  | 1.24  | 6.90   | 5.33  | 5.71  | 9.15E-13 | 9.47E-12  |
| ENSG00000261606 | RP11-414J4.2   | 2.52 | 0.12  | 0.02  | 0.00  | 0.47   | 0.21  | 0.29  | 2.51E-08 | 2.01E-07  |
| ENSG00000260231 | JHDM1D-AS1     | 2.52 | 1.31  | 1.11  | 0.63  | 5.68   | 5.43  | 5.45  | 3.37E-21 | 4.95E-20  |
| ENSG00000236772 | RP5-1184F4.5   | 2.51 | 0.40  | 0.33  | 0.22  | 3.26   | 1.64  | 3.07  | 5.57E-09 | 4.66E-08  |
| ENSG00000272030 | RP1-178F15.4   | 2.51 | 0.19  | 0.47  | 1.23  | 3.66   | 3.64  | 3.28  | 1.01E-10 | 9.39E-10  |
| ENSG00000280604 | PCBP3-OT1      | 2.51 | 0.12  | 0.14  | 0.00  | 0.49   | 0.46  | 0.67  | 4.78E-09 | 4.02E-08  |
| ENSG00000268001 | CARD8-AS1      | 2.51 | 1.39  | 2.17  | 2.73  | 9.26   | 12.91 | 11.19 | 2.35E-28 | 4.36E-27  |
| ENSG00000271643 | RP11-10C24.3   | 2.50 | 0.15  | 1.43  | 1.19  | 6.62   | 3.99  | 3.25  | 4.79E-13 | 5.05E-12  |
| ENSG00000177406 | RP11-218M22.1  | 2.50 | 1.05  | 2.42  | 2.44  | 10.39  | 9.09  | 9.98  | 2.54E-37 | 6.03E-36  |
| ENSG00000245532 | NEAT1          | 2.49 | 18.41 | 16.65 | 21.95 | 116.30 | 84.57 | 93.80 | 5.59E-05 | 0.0003399 |
| ENSG00000267737 | AC061992.2     | 2.49 | 0.00  | 0.57  | 0.38  | 1.87   | 1.59  | 2.64  | 1.68E-08 | 1.36E-07  |
| ENSG00000244055 | AC007566.10    | 2.48 | 2.51  | 0.23  | 0.92  | 5.51   | 6.04  | 6.47  | 3.29E-11 | 3.15E-10  |
| ENSG00000283696 | RP11-122G18.12 | 2.48 | 1.77  | 1.65  | 2.59  | 10.76  | 10.73 | 11.27 | 1.27E-18 | 1.70E-17  |
| ENSG00000262319 | CTC-457L16.2   | 2.48 | 0.07  | 0.06  | 0.24  | 0.80   | 0.98  | 0.89  | 1.35E-08 | 1.10E-07  |
| ENSG00000281641 | SAMD12-AS1     | 2.47 | 0.00  | 0.37  | 1.22  | 4.14   | 2.06  | 2.46  | 1.14E-08 | 9.35E-08  |
| ENSG00000180539 | C9orf139       | 2.46 | 0.35  | 0.30  | 0.30  | 2.06   | 1.42  | 1.91  | 2.03E-16 | 2.47E-15  |
| ENSG00000256124 | LINC01152      | 2.46 | 0.10  | 0.33  | 0.05  | 0.75   | 0.90  | 0.97  | 3.95E-10 | 3.56E-09  |
| ENSG00000250775 | RP11-12K22.1   | 2.46 | 0.44  | 2.20  | 0.00  | 4.31   | 5.40  | 4.82  | 3.52E-08 | 2.79E-07  |
| ENSG00000225431 | AP001626.1     | 2.44 | 0.55  | 2.96  | 2.43  | 9.30   | 7.16  | 9.25  | 3.35E-16 | 4.05E-15  |
| ENSG00000264635 | RP11-769O8.3   | 2.44 | 0.37  | 0.20  | 0.13  | 2.00   | 2.01  | 1.08  | 8.66E-09 | 7.15E-08  |
| ENSG00000261468 | RP11-1024P17.1 | 2.42 | 0.51  | 0.00  | 0.00  | 0.78   | 0.74  | 1.13  | 2.92E-07 | 2.17E-06  |
| ENSG00000237781 | RP11-54A4.2    | 2.40 | 0.00  | 0.25  | 1.30  | 2.90   | 2.73  | 2.92  | 1.48E-07 | 1.12E-06  |
| ENSG00000253535 | RP11-624C23.1  | 2.39 | 0.00  | 0.37  | 0.32  | 1.44   | 1.50  | 1.45  | 1.31E-07 | 9.94E-07  |
| ENSG00000241155 | ARHGAP31-AS1   | 2.38 | 0.63  | 0.00  | 0.00  | 1.72   | 1.62  | 2.77  | 1.96E-06 | 1.36E-05  |
| ENSG00000262001 | DLGAP1-AS2     | 2.37 | 0.43  | 0.31  | 0.41  | 2.10   | 1.65  | 2.52  | 2.61E-13 | 2.79E-12  |
| ENSG00000240207 | RP11-379F4.4   | 2.37 | 0.19  | 0.39  | 0.21  | 1.34   | 1.45  | 1.35  | 2.11E-12 | 2.14E-11  |
| ENSG00000233355 | CHRM3-AS2      | 2.36 | 0.45  | 0.47  | 0.39  | 2.48   | 2.08  | 2.22  | 1.78E-15 | 2.10E-14  |
| ENSG00000162888 | C1orf147       | 2.36 | 0.28  | 0.78  | 1.23  | 4.40   | 3.37  | 2.89  | 4.66E-14 | 5.17E-13  |
| ENSG00000270069 | MIR222HG       | 2.36 | 1.26  | 0.94  | 1.62  | 6.62   | 6.23  | 5.66  | 1.10E-22 | 1.71E-21  |
| ENSG00000233967 | RP11-250B2.3   | 2.32 | 0.84  | 1.23  | 1.15  | 4.59   | 6.91  | 5.78  | 1.37E-11 | 1.34E-10  |
| ENSG00000263466 | RP1-56K13.2    | 2.31 | 0.45  | 0.00  | 0.99  | 3.44   | 2.77  | 4.45  | 1.22E-06 | 8.61E-06  |
| ENSG00000248636 | RP11-768F21.1  | 2.31 | 0.39  | 0.32  | 0.00  | 1.69   | 2.99  | 0.85  | 7.65E-07 | 5.49E-06  |
| ENSG00000226380 | MIR29A         | 2.30 | 0.06  | 0.05  | 0.16  | 0.64   | 0.42  | 0.39  | 7.40E-09 | 6.14E-08  |
| ENSG00000206417 | H1FX-AS1       | 2.30 | 0.34  | 0.72  | 1.01  | 3.26   | 2.89  | 3.10  | 1.65E-16 | 2.02E-15  |
| ENSG00000233452 | STXBP5-AS1     | 2.30 | 0.13  | 0.08  | 0.11  | 0.57   | 0.37  | 1.01  | 2.06E-09 | 1.77E-08  |
| ENSG00000264548 | RP13-516M14.2  | 2.29 | 0.08  | 0.00  | 0.09  | 0.72   | 0.60  | 0.37  | 3.32E-06 | 2.26E-05  |
| ENSG00000266680 | RP5-1148A21.3  | 2.29 | 0.28  | 0.35  | 0.31  | 1.83   | 2.30  | 1.69  | 3.17E-08 | 2.52E-07  |
| ENSG00000270604 | HCG17          | 2.29 | 0.00  | 0.22  | 0.28  | 0.57   | 2.13  | 3.13  | 4.06E-06 | 2.75E-05  |
| ENSG00000230489 | VAV3-AS1       | 2.28 | 0.32  | 0.00  | 0.70  | 3.81   | 3.26  | 1.05  | 1.83E-06 | 1.28E-05  |
| ENSG00000237741 | AC002368.4     | 2.27 | 0.50  | 0.42  | 0.00  | 1.66   | 3.12  | 5.57  | 5.23E-06 | 3.50E-05  |
| ENSG00000225339 | RP11-513I15.6  | 2.26 | 0.07  | 0.10  | 0.05  | 0.67   | 0.41  | 0.23  | 6.39E-09 | 5.33E-08  |
| ENSG00000268027 | AC006129.2     | 2.26 | 0.00  | 0.23  | 0.15  | 1.19   | 0.98  | 0.75  | 3.14E-06 | 2.15E-05  |

|                 |                |      |       |       |       |        |        |        |           |           |
|-----------------|----------------|------|-------|-------|-------|--------|--------|--------|-----------|-----------|
| ENSG00000243193 | CTA-360L10.1   | 2.26 | 0.09  | 0.00  | 0.10  | 0.59   | 0.46   | 0.69   | 4.78E-06  | 3.22E-05  |
| ENSG00000233695 | GAS6-AS1       | 2.26 | 1.61  | 0.83  | 1.47  | 6.79   | 4.90   | 5.28   | 1.85E-35  | 4.18E-34  |
| ENSG00000225335 | B476C20.9      | 2.25 | 1.66  | 2.28  | 2.02  | 10.36  | 8.49   | 8.12   | 2.94E-23  | 4.63E-22  |
| ENSG00000260742 | RP11-366L5.1   | 2.25 | 0.26  | 0.22  | 0.17  | 0.96   | 1.06   | 1.36   | 6.29E-10  | 5.60E-09  |
| ENSG00000274373 | RP13-714J12.1  | 2.25 | 0.00  | 0.23  | 0.31  | 3.04   | 2.29   | 0.61   | 6.58E-06  | 4.37E-05  |
| ENSG00000278869 | CITF22-49E9.3  | 2.24 | 0.00  | 0.00  | 0.98  | 1.96   | 1.84   | 0.99   | 4.09E-06  | 2.77E-05  |
| ENSG00000261294 | RP11-616M22.3  | 2.24 | 1.74  | 1.95  | 1.91  | 10.79  | 8.95   | 10.87  | 6.61E-09  | 5.50E-08  |
| ENSG00000246898 | LINC00920      | 2.24 | 2.09  | 2.83  | 2.81  | 12.29  | 11.46  | 10.47  | 5.77E-26  | 9.91E-25  |
| ENSG00000246145 | RRS1-AS1       | 2.23 | 0.09  | 0.19  | 0.20  | 0.93   | 0.65   | 0.89   | 5.14E-09  | 4.31E-08  |
| ENSG00000254419 | RP11-261P9.4   | 2.23 | 4.75  | 5.41  | 7.46  | 26.39  | 23.08  | 28.84  | 2.28E-19  | 3.14E-18  |
| ENSG00000262692 | CTD-3195I5.3   | 2.21 | 6.05  | 10.17 | 7.40  | 39.06  | 32.59  | 34.16  | 1.93E-15  | 2.26E-14  |
| ENSG00000281961 | AF067845.3     | 2.21 | 0.81  | 0.69  | 1.79  | 8.04   | 5.88   | 4.05   | 6.15E-08  | 4.78E-07  |
| ENSG00000245648 | RP11-277P12.20 | 2.21 | 0.00  | 0.17  | 0.08  | 0.61   | 0.43   | 0.53   | 3.65E-06  | 2.48E-05  |
| ENSG00000231671 | LINC01307      | 2.21 | 0.63  | 1.06  | 1.39  | 5.20   | 3.75   | 5.41   | 2.15E-11  | 2.08E-10  |
| ENSG00000258422 | RP11-486O13.2  | 2.21 | 0.00  | 0.15  | 0.19  | 1.55   | 0.91   | 0.78   | 1.03E-05  | 6.74E-05  |
| ENSG00000267138 | AC005954.3     | 2.20 | 1.16  | 0.49  | 0.64  | 6.36   | 4.79   | 4.49   | 1.56E-06  | 1.10E-05  |
| ENSG00000255092 | RP11-58K22.4   | 2.20 | 1.03  | 0.87  | 0.38  | 5.30   | 3.20   | 4.57   | 1.95E-07  | 1.46E-06  |
| ENSG00000183154 | RP11-863K10.7  | 2.19 | 0.84  | 1.58  | 1.03  | 5.76   | 5.61   | 3.83   | 2.39E-15  | 2.80E-14  |
| ENSG00000215769 | RP13-104F24.2  | 2.17 | 1.74  | 2.49  | 2.13  | 10.73  | 7.31   | 9.03   | 1.50E-26  | 2.61E-25  |
| ENSG00000272630 | RP11-344N10.5  | 2.16 | 0.78  | 1.04  | 0.64  | 4.07   | 3.16   | 3.45   | 2.71E-15  | 3.15E-14  |
| ENSG00000233154 | RP4-655J12.4   | 2.16 | 0.11  | 0.10  | 0.00  | 0.76   | 0.47   | 0.76   | 1.70E-05  | 0.0001089 |
| ENSG00000265148 | TSPOAP1-AS1    | 2.16 | 15.10 | 16.99 | 18.42 | 70.76  | 63.65  | 72.49  | 5.02E-103 | 3.65E-101 |
| ENSG00000260145 | RP11-322D14.2  | 2.16 | 0.87  | 0.73  | 1.60  | 7.34   | 3.60   | 5.15   | 1.63E-08  | 1.32E-07  |
| ENSG00000229401 | MIR5689HG      | 2.15 | 0.00  | 0.76  | 0.00  | 1.50   | 1.64   | 1.01   | 1.51E-05  | 9.72E-05  |
| ENSG00000266473 | RP11-401F2.3   | 2.15 | 0.28  | 0.24  | 0.00  | 2.18   | 1.46   | 1.25   | 1.91E-05  | 0.0001215 |
| ENSG00000235978 | AC018816.3     | 2.15 | 2.97  | 3.55  | 3.44  | 14.06  | 13.39  | 14.51  | 3.99E-20  | 5.65E-19  |
| ENSG00000274184 | RP11-158H5.8   | 2.14 | 0.19  | 0.33  | 0.21  | 1.17   | 0.80   | 2.25   | 2.16E-07  | 1.62E-06  |
| ENSG00000234883 | MIR155HG       | 2.13 | 0.98  | 1.13  | 1.21  | 4.02   | 6.56   | 4.32   | 1.26E-12  | 1.30E-11  |
| ENSG00000267750 | RUNDC3A-AS1    | 2.13 | 0.87  | 1.19  | 1.24  | 4.76   | 4.26   | 4.44   | 3.93E-24  | 6.36E-23  |
| ENSG00000267128 | RP11-449J21.5  | 2.13 | 0.34  | 0.29  | 0.66  | 2.63   | 1.86   | 1.42   | 2.47E-09  | 2.11E-08  |
| ENSG00000255299 | RP11-655C2.3   | 2.12 | 0.98  | 0.98  | 1.07  | 5.57   | 5.03   | 3.67   | 1.12E-09  | 9.78E-09  |
| ENSG00000245017 | RP11-181C3.1   | 2.12 | 0.10  | 0.86  | 0.45  | 2.01   | 1.47   | 2.03   | 2.34E-08  | 1.88E-07  |
| ENSG00000225032 | RP11-228B15.4  | 2.10 | 3.22  | 3.44  | 3.93  | 14.03  | 12.39  | 16.35  | 6.90E-28  | 1.26E-26  |
| ENSG00000269243 | CTD-2231E14.8  | 2.10 | 0.50  | 0.50  | 0.55  | 1.64   | 2.21   | 2.92   | 4.27E-13  | 4.50E-12  |
| ENSG00000260051 | LA16c-390E6.4  | 2.09 | 13.04 | 11.83 | 12.09 | 62.46  | 34.69  | 54.59  | 1.63E-25  | 2.76E-24  |
| ENSG00000215244 | RP11-563J2.2   | 2.09 | 0.25  | 0.00  | 0.21  | 0.76   | 0.46   | 0.77   | 1.99E-06  | 1.38E-05  |
| ENSG00000238018 | AC093110.3     | 2.08 | 2.22  | 2.53  | 2.96  | 12.67  | 8.65   | 10.32  | 3.47E-16  | 4.20E-15  |
| ENSG00000240990 | HOXA11-AS      | 2.08 | 0.00  | 0.11  | 0.15  | 0.59   | 0.42   | 0.44   | 1.33E-05  | 8.60E-05  |
| ENSG00000235609 | AF127936.9     | 2.07 | 0.13  | 0.19  | 0.47  | 0.87   | 1.23   | 0.95   | 1.46E-10  | 1.34E-09  |
| ENSG00000250075 | RP11-584P21.2  | 2.07 | 0.00  | 0.22  | 0.09  | 0.28   | 0.97   | 0.66   | 1.74E-05  | 0.0001112 |
| ENSG00000261000 | RP11-534L20.5  | 2.07 | 1.15  | 0.32  | 0.42  | 2.95   | 3.57   | 3.82   | 4.85E-06  | 3.26E-05  |
| ENSG00000250286 | RP11-94C24.8   | 2.07 | 0.88  | 0.74  | 1.22  | 5.81   | 3.42   | 3.90   | 2.11E-08  | 1.70E-07  |
| ENSG00000272168 | CASC15         | 2.07 | 11.64 | 12.15 | 12.77 | 47.90  | 45.96  | 46.91  | 1.84E-173 | 2.86E-171 |
| ENSG00000277287 | RP4-794I6.4    | 2.06 | 0.03  | 0.09  | 0.00  | 0.19   | 0.21   | 0.30   | 1.84E-05  | 0.0001176 |
| ENSG00000223685 | LINC00571      | 2.06 | 0.17  | 0.00  | 0.18  | 1.09   | 0.51   | 1.28   | 3.92E-05  | 0.0002421 |
| ENSG00000263033 | RP11-396B14.2  | 2.05 | 0.00  | 0.31  | 0.20  | 1.22   | 0.57   | 1.84   | 3.21E-05  | 0.0001998 |
| ENSG00000271151 | RP11-394I13.2  | 2.05 | 0.92  | 0.62  | 0.81  | 3.61   | 3.40   | 3.44   | 3.20E-08  | 2.54E-07  |
| ENSG00000272068 | RP11-284F21.9  | 2.04 | 2.91  | 1.63  | 1.94  | 8.45   | 7.51   | 8.45   | 8.75E-24  | 1.40E-22  |
| ENSG00000234817 | RP3-400B16.1   | 2.04 | 0.69  | 0.36  | 0.47  | 2.07   | 1.95   | 2.37   | 2.54E-09  | 2.17E-08  |
| ENSG00000225138 | CTD-2228K2.7   | 2.03 | 16.77 | 14.52 | 20.02 | 73.84  | 51.21  | 69.17  | 1.03E-99  | 7.20E-98  |
| ENSG00000260740 | AC026471.6     | 2.03 | 0.00  | 0.28  | 0.75  | 2.23   | 1.40   | 2.62   | 3.69E-05  | 0.0002288 |
| ENSG00000103472 | RRN3P2         | 2.02 | 0.42  | 0.00  | 0.18  | 0.73   | 1.38   | 0.46   | 5.61E-06  | 3.75E-05  |
| ENSG00000256988 | RP11-234B24.4  | 2.02 | 26.57 | 43.21 | 47.48 | 143.78 | 140.20 | 142.94 | 4.67E-40  | 1.18E-38  |
| ENSG00000258056 | RP11-644F5.11  | 2.01 | 2.71  | 5.01  | 4.78  | 16.20  | 14.82  | 14.98  | 4.37E-21  | 6.41E-20  |

|                 |                |      |       |       |       |       |       |       |           |           |
|-----------------|----------------|------|-------|-------|-------|-------|-------|-------|-----------|-----------|
| ENSG00000214894 | LINC00243      | 2.01 | 0.18  | 0.23  | 0.00  | 0.79  | 0.56  | 0.70  | 1.79E-05  | 0.0001141 |
| ENSG00000273328 | RP11-141M3.6   | 2.01 | 0.15  | 0.04  | 0.16  | 0.44  | 0.56  | 0.66  | 2.62E-06  | 1.80E-05  |
| ENSG00000203804 | ADAMTSL4-AS1   | 2.00 | 0.22  | 0.13  | 0.00  | 0.65  | 0.46  | 0.58  | 1.93E-05  | 0.0001231 |
| ENSG00000234261 | RP11-146I2.1   | 2.00 | 0.11  | 0.00  | 0.25  | 1.61  | 0.23  | 0.75  | 4.41E-05  | 0.000271  |
| ENSG00000240057 | RP11-572M11.4  | 2.00 | 1.17  | 0.99  | 0.97  | 3.32  | 4.23  | 4.86  | 7.54E-12  | 7.46E-11  |
| ENSG00000254815 | RP11-496I9.1   | 1.99 | 1.21  | 2.11  | 2.14  | 7.01  | 5.42  | 7.86  | 2.44E-17  | 3.09E-16  |
| ENSG00000224596 | ZMIZ1-AS1      | 1.99 | 0.35  | 0.04  | 0.05  | 0.39  | 0.55  | 0.59  | 2.64E-06  | 1.81E-05  |
| ENSG00000260339 | HEXA-AS1       | 1.99 | 0.44  | 0.43  | 0.56  | 1.84  | 1.43  | 2.75  | 2.58E-09  | 2.20E-08  |
| ENSG00000237667 | LINC01115      | 1.98 | 3.35  | 4.76  | 4.82  | 17.93 | 17.40 | 12.66 | 1.18E-21  | 1.77E-20  |
| ENSG00000247774 | PCED1B-AS1     | 1.98 | 24.60 | 27.28 | 25.07 | 89.34 | 94.36 | 95.89 | 9.58E-100 | 6.72E-98  |
| ENSG00000232788 | AC078883.3     | 1.98 | 0.18  | 0.76  | 0.00  | 0.60  | 1.50  | 2.41  | 2.56E-05  | 0.0001613 |
| ENSG00000205885 | C1RL-AS1       | 1.98 | 5.39  | 4.78  | 5.72  | 19.43 | 19.04 | 19.11 | 1.74E-56  | 6.13E-55  |
| ENSG00000265975 | CTB-41I6.2     | 1.98 | 3.51  | 6.20  | 7.35  | 20.79 | 18.84 | 22.50 | 4.08E-14  | 4.54E-13  |
| ENSG00000256967 | RP11-273B20.1  | 1.97 | 2.49  | 4.18  | 6.94  | 23.29 | 11.29 | 14.30 | 2.41E-18  | 3.19E-17  |
| ENSG00000254966 | RP11-1081L13.4 | 1.97 | 1.34  | 0.56  | 0.99  | 5.89  | 3.23  | 3.21  | 1.50E-07  | 1.13E-06  |
| ENSG00000232043 | RP4-530I15.9   | 1.97 | 0.09  | 0.11  | 0.19  | 0.37  | 0.88  | 0.52  | 1.33E-06  | 9.37E-06  |
| ENSG00000259954 | IL21R-AS1      | 1.96 | 0.07  | 0.06  | 0.08  | 0.66  | 0.23  | 0.66  | 5.00E-05  | 0.0003056 |
| ENSG00000236151 | RP5-1100I6.1   | 1.95 | 5.86  | 2.77  | 2.82  | 14.46 | 13.60 | 13.35 | 7.66E-11  | 7.16E-10  |
| ENSG00000253552 | HOXA-AS2       | 1.95 | 0.37  | 0.59  | 0.24  | 1.38  | 1.22  | 1.80  | 4.62E-11  | 4.38E-10  |
| ENSG00000253199 | RP11-421P23.1  | 1.94 | 0.38  | 0.16  | 0.21  | 1.25  | 0.78  | 1.36  | 3.59E-06  | 2.44E-05  |
| ENSG00000186594 | MIR22HG        | 1.94 | 3.08  | 5.62  | 6.20  | 19.18 | 15.81 | 15.99 | 9.82E-33  | 2.07E-31  |
| ENSG00000254718 | CTD-2184C24.2  | 1.94 | 0.50  | 0.57  | 0.48  | 2.31  | 1.54  | 2.19  | 6.47E-10  | 5.76E-09  |
| ENSG00000248740 | RP11-328K4.1   | 1.94 | 0.21  | 0.71  | 0.47  | 2.79  | 1.75  | 1.87  | 8.99E-06  | 5.90E-05  |
| ENSG00000239300 | RP11-400L8.2   | 1.93 | 1.19  | 0.00  | 0.44  | 2.18  | 2.47  | 3.08  | 6.27E-05  | 0.0003786 |
| ENSG00000272505 | RP11-981G7.6   | 1.92 | 0.07  | 0.17  | 0.23  | 0.67  | 0.63  | 0.76  | 9.49E-06  | 6.22E-05  |
| ENSG00000231185 | AC005592.2     | 1.91 | 0.00  | 0.18  | 0.12  | 0.47  | 0.67  | 0.60  | 0.0001285 | 0.0007507 |
| ENSG00000267532 | MIR497HG       | 1.90 | 0.15  | 0.00  | 0.11  | 0.61  | 0.37  | 0.22  | 4.47E-05  | 0.0002743 |
| ENSG00000254693 | RP11-58K22.5   | 1.90 | 0.36  | 0.00  | 0.79  | 1.58  | 2.60  | 1.99  | 0.0001165 | 0.0006849 |
| ENSG00000261366 | MANEA-AS1      | 1.90 | 0.78  | 0.65  | 0.85  | 3.59  | 2.05  | 3.05  | 9.51E-10  | 8.38E-09  |
| ENSG00000280303 | ERICD          | 1.90 | 0.68  | 1.15  | 0.75  | 3.53  | 2.62  | 3.34  | 1.16E-09  | 1.01E-08  |
| ENSG00000273076 | RP3-508I15.22  | 1.90 | 1.88  | 1.98  | 0.52  | 4.64  | 7.28  | 5.71  | 3.83E-06  | 2.60E-05  |
| ENSG00000249502 | AC006160.5     | 1.90 | 0.78  | 0.66  | 0.29  | 4.00  | 2.42  | 1.73  | 1.28E-05  | 8.31E-05  |
| ENSG00000233621 | LINC01137      | 1.90 | 9.11  | 9.90  | 4.63  | 25.68 | 23.43 | 29.12 | 8.45E-26  | 1.45E-24  |
| ENSG00000225506 | CYP4A22-AS1    | 1.90 | 0.64  | 0.71  | 0.23  | 2.79  | 1.75  | 2.35  | 8.80E-06  | 5.78E-05  |
| ENSG00000241525 | AC108004.3     | 1.90 | 2.51  | 2.98  | 2.44  | 11.83 | 10.22 | 6.86  | 6.57E-14  | 7.23E-13  |
| ENSG00000274315 | RP11-996F15.5  | 1.89 | 0.39  | 1.63  | 0.00  | 2.13  | 2.81  | 3.01  | 6.96E-05  | 0.0004179 |
| ENSG00000260911 | RP11-196G11.2  | 1.89 | 0.87  | 0.37  | 0.48  | 5.73  | 3.15  | 1.44  | 6.33E-05  | 0.0003824 |
| ENSG00000244041 | LINC01011      | 1.89 | 0.83  | 0.76  | 1.07  | 3.05  | 3.09  | 3.38  | 1.75E-11  | 1.70E-10  |
| ENSG00000230155 | RP3-477O4.14   | 1.88 | 6.76  | 6.08  | 4.36  | 18.41 | 19.72 | 21.12 | 3.51E-16  | 4.24E-15  |
| ENSG00000275371 | RP11-455F5.6   | 1.88 | 1.47  | 0.46  | 1.22  | 5.66  | 2.66  | 3.46  | 1.37E-07  | 1.03E-06  |
| ENSG00000206028 | CTA-373H7.7    | 1.88 | 0.22  | 0.44  | 0.33  | 1.07  | 1.31  | 1.49  | 5.56E-07  | 4.04E-06  |
| ENSG00000262089 | RP11-589P10.5  | 1.88 | 15.39 | 14.86 | 8.79  | 44.40 | 38.82 | 49.77 | 2.68E-15  | 3.13E-14  |
| ENSG00000259989 | CTD-2555A7.1   | 1.87 | 0.41  | 0.35  | 0.46  | 2.27  | 3.42  | 1.83  | 0.0001238 | 0.0007254 |
| ENSG00000236194 | AC003104.1     | 1.87 | 0.92  | 0.88  | 1.15  | 5.16  | 4.18  | 2.17  | 9.28E-09  | 7.64E-08  |
| ENSG00000232677 | LINC00665      | 1.87 | 0.03  | 0.05  | 0.03  | 0.18  | 0.28  | 0.12  | 8.02E-05  | 0.0004788 |
| ENSG00000229891 | LINC01315      | 1.87 | 0.15  | 1.17  | 0.00  | 1.52  | 1.43  | 0.85  | 4.25E-05  | 0.0002615 |
| ENSG00000272491 | RP5-1024N4.4   | 1.86 | 0.00  | 0.20  | 0.13  | 0.90  | 0.60  | 0.39  | 0.0001937 | 0.0011151 |
| ENSG00000223855 | HRAT92         | 1.85 | 0.78  | 0.80  | 1.11  | 3.67  | 2.76  | 2.84  | 2.22E-12  | 2.25E-11  |
| ENSG00000257534 | RP11-834C11.10 | 1.84 | 0.00  | 0.22  | 0.57  | 1.99  | 1.34  | 0.86  | 0.0002203 | 0.00126   |
| ENSG00000233360 | Z83844.1       | 1.84 | 0.10  | 0.17  | 0.22  | 1.10  | 0.62  | 0.67  | 6.09E-05  | 0.0003683 |

|                 |                |      |       |       |       |        |        |        |               |           |
|-----------------|----------------|------|-------|-------|-------|--------|--------|--------|---------------|-----------|
| ENSG00000267586 | LINC00907      | 1.84 | 0.04  | 0.02  | 0.02  | 0.07   | 0.37   | 0.09   | 0.000103<br>2 | 0.0006101 |
| ENSG00000273096 | RP3-508I15.20  | 1.84 | 8.55  | 8.98  | 5.88  | 31.64  | 25.36  | 27.16  | 2.55E-08      | 2.04E-07  |
| ENSG00000259668 | RP11-707P17.2  | 1.84 | 0.93  | 1.82  | 2.73  | 7.47   | 5.91   | 4.62   | 4.83E-10      | 4.33E-09  |
| ENSG00000260267 | RP11-452L6.5   | 1.83 | 11.44 | 9.45  | 9.46  | 34.59  | 30.20  | 34.92  | 7.71E-46      | 2.19E-44  |
| ENSG00000254614 | AP003068.23    | 1.83 | 0.66  | 1.19  | 0.84  | 3.35   | 2.70   | 3.38   | 1.08E-08      | 8.82E-08  |
| ENSG00000232977 | LINC00327      | 1.83 | 0.24  | 0.35  | 0.26  | 0.99   | 1.05   | 1.19   | 6.35E-07      | 4.60E-06  |
| ENSG00000274317 | RP11-93G5.1    | 1.83 | 0.12  | 0.03  | 0.13  | 0.56   | 0.53   | 0.17   | 2.53E-05      | 0.0001592 |
| ENSG00000229152 | ANKRD10-IT1    | 1.83 | 16.87 | 12.13 | 14.00 | 61.39  | 37.58  | 44.84  | 4.41E-25      | 7.35E-24  |
| ENSG00000273443 | RP11-54O7.18   | 1.82 | 0.71  | 0.79  | 2.08  | 4.40   | 3.89   | 3.91   | 9.66E-07      | 6.89E-06  |
| ENSG00000258512 | LINC00239      | 1.82 | 6.43  | 4.89  | 3.71  | 19.13  | 16.10  | 14.88  | 5.06E-12      | 5.05E-11  |
| ENSG00000267475 | CTD-2538C1.2   | 1.82 | 2.07  | 4.34  | 2.27  | 9.06   | 9.24   | 11.03  | 1.57E-08      | 1.28E-07  |
| ENSG00000223979 | SMCR2          | 1.80 | 0.35  | 0.29  | 0.76  | 2.66   | 3.58   | 1.15   | 0.000144<br>3 | 0.0008398 |
| ENSG00000245750 | DRAIC          | 1.80 | 0.14  | 0.06  | 0.08  | 0.46   | 0.64   | 0.31   | 0.000146<br>4 | 0.0008523 |
| ENSG00000232160 | RAP2C-AS1      | 1.80 | 0.28  | 0.19  | 0.12  | 0.79   | 0.68   | 0.73   | 6.22E-06      | 4.14E-05  |
| ENSG00000273901 | CTD-2619J13.27 | 1.80 | 0.62  | 1.56  | 0.34  | 4.07   | 1.91   | 3.76   | 2.74E-05      | 0.000172  |
| ENSG00000254092 | RP11-369E15.3  | 1.79 | 27.20 | 29.57 | 29.43 | 93.61  | 99.19  | 84.99  | 1.08E-24      | 1.77E-23  |
| ENSG00000260997 | RP4-647J21.1   | 1.78 | 72.04 | 90.94 | 99.72 | 310.10 | 253.60 | 264.15 | 7.10E-<br>124 | 6.67E-122 |
| ENSG00000265451 | RP11-204L24.2  | 1.78 | 0.00  | 1.69  | 2.84  | 2.83   | 5.03   | 3.17   | 2.65E-05      | 0.0001668 |
| ENSG00000226312 | CFLAR-AS1      | 1.78 | 0.14  | 0.04  | 0.05  | 0.30   | 0.37   | 0.30   | 0.000128<br>5 | 0.0007506 |
| ENSG00000281538 | RP4-669P10.20  | 1.78 | 4.03  | 5.99  | 5.80  | 16.32  | 17.59  | 17.47  | 9.20E-12      | 9.07E-11  |
| ENSG00000246582 | RP11-1149O23.3 | 1.78 | 0.32  | 0.74  | 0.44  | 2.02   | 1.57   | 1.50   | 3.67E-07      | 2.70E-06  |
| ENSG00000261324 | RP11-174G6.5   | 1.76 | 0.97  | 0.61  | 1.07  | 3.04   | 3.23   | 2.15   | 5.75E-14      | 6.34E-13  |
| ENSG00000257176 | RP11-996F15.2  | 1.76 | 1.53  | 0.99  | 1.22  | 3.96   | 3.51   | 4.61   | 6.70E-12      | 6.66E-11  |
| ENSG00000268069 | RP5-1057I20.4  | 1.76 | 1.63  | 0.61  | 0.80  | 3.97   | 2.62   | 3.60   | 1.16E-06      | 8.23E-06  |
| ENSG00000277763 | CTD-2588E21.1  | 1.75 | 0.58  | 0.49  | 0.32  | 2.54   | 2.69   | 1.28   | 0.000155      | 0.0009001 |
| ENSG00000227589 | RP5-1092A11.5  | 1.75 | 0.78  | 0.65  | 0.00  | 1.71   | 1.61   | 2.01   | 0.000184<br>8 | 0.0010655 |
| ENSG00000215068 | AC025171.1     | 1.75 | 7.55  | 9.07  | 9.24  | 28.23  | 24.59  | 27.35  | 2.29E-35      | 5.16E-34  |
| ENSG00000272211 | RP11-347P5.1   | 1.75 | 0.47  | 0.24  | 0.21  | 1.04   | 1.07   | 1.26   | 1.95E-05      | 0.000124  |
| ENSG00000272267 | RP11-375N15.2  | 1.75 | 0.28  | 0.36  | 0.31  | 2.34   | 1.17   | 0.78   | 6.32E-05      | 0.0003815 |
| ENSG00000231133 | HAR1B          | 1.73 | 3.06  | 2.39  | 1.20  | 7.42   | 7.21   | 6.03   | 1.96E-08      | 1.58E-07  |
| ENSG00000223725 | AC007879.5     | 1.73 | 0.00  | 0.38  | 0.50  | 1.00   | 1.26   | 0.84   | 0.000218<br>4 | 0.0012493 |
| ENSG00000255355 | AP000640.2     | 1.73 | 0.21  | 0.36  | 0.00  | 1.41   | 0.44   | 1.42   | 0.000592<br>1 | 0.0032122 |
| ENSG00000283036 | RP11-101C21.4  | 1.73 | 0.20  | 0.33  | 0.00  | 1.30   | 0.41   | 1.31   | 0.000592<br>1 | 0.0032122 |
| ENSG00000205018 | RP11-830F9.6   | 1.73 | 0.97  | 1.45  | 1.43  | 4.50   | 3.12   | 4.89   | 3.01E-09      | 2.56E-08  |
| ENSG00000245275 | SAP30L-AS1     | 1.73 | 0.89  | 1.17  | 1.31  | 3.05   | 3.68   | 4.16   | 5.03E-09      | 4.22E-08  |
| ENSG00000235852 | AC005540.3     | 1.73 | 1.06  | 0.36  | 0.47  | 3.03   | 1.98   | 1.88   | 4.07E-05      | 0.0002509 |
| ENSG00000189223 | PAX8-AS1       | 1.72 | 0.25  | 0.46  | 0.54  | 1.22   | 1.27   | 1.18   | 2.24E-16      | 2.73E-15  |
| ENSG00000229771 | RP4-644L1.2    | 1.72 | 1.05  | 0.69  | 0.77  | 2.83   | 3.02   | 2.46   | 3.20E-07      | 2.37E-06  |
| ENSG00000233429 | HOTAIRM1       | 1.72 | 8.50  | 8.46  | 10.65 | 31.40  | 26.03  | 26.58  | 2.74E-24      | 4.47E-23  |
| ENSG00000267571 | AC104532.4     | 1.71 | 0.66  | 1.40  | 1.10  | 4.01   | 3.08   | 4.40   | 3.17E-05      | 0.0001978 |
| ENSG00000231507 | LINC01353      | 1.71 | 2.34  | 2.75  | 6.43  | 9.22   | 12.05  | 11.88  | 3.34E-10      | 3.03E-09  |
| ENSG00000255737 | AGAP2-AS1      | 1.70 | 0.26  | 0.22  | 0.86  | 1.57   | 1.08   | 1.73   | 4.04E-05      | 0.0002493 |
| ENSG00000182912 | TSPEAR-AS2     | 1.70 | 4.91  | 5.16  | 5.69  | 18.85  | 14.34  | 14.64  | 4.90E-26      | 8.44E-25  |
| ENSG00000215067 | ALOX12-AS1     | 1.70 | 6.81  | 6.44  | 4.42  | 18.73  | 16.24  | 17.33  | 1.43E-28      | 2.67E-27  |
| ENSG00000260368 | RP11-521I2.3   | 1.69 | 1.20  | 0.86  | 0.00  | 2.44   | 1.94   | 1.14   | 6.34E-05      | 0.0003829 |
| ENSG00000247828 | TMEM161B-AS1   | 1.69 | 6.43  | 6.07  | 7.23  | 20.20  | 19.09  | 19.47  | 4.23E-37      | 9.97E-36  |
| ENSG00000256576 | RP13-977J11.2  | 1.69 | 15.55 | 17.95 | 19.88 | 56.80  | 45.27  | 57.08  | 1.06E-34      | 2.34E-33  |

|                 |                |      |       |       |       |       |       |       |               |           |
|-----------------|----------------|------|-------|-------|-------|-------|-------|-------|---------------|-----------|
| ENSG00000232725 | U52111.14      | 1.69 | 0.54  | 0.30  | 0.40  | 2.57  | 0.56  | 2.58  | 0.000114<br>1 | 0.0006716 |
| ENSG00000261996 | CTC-281F24.1   | 1.69 | 19.13 | 14.78 | 21.31 | 59.54 | 52.11 | 51.63 | 1.20E-25      | 2.04E-24  |
| ENSG00000229056 | AC020571.3     | 1.68 | 0.97  | 1.74  | 1.34  | 4.00  | 4.90  | 3.63  | 2.03E-08      | 1.63E-07  |
| ENSG00000249601 | LINC01187      | 1.68 | 0.17  | 0.21  | 0.09  | 0.65  | 0.52  | 0.75  | 0.000223<br>5 | 0.0012768 |
| ENSG00000245281 | CTD-2547L16.1  | 1.68 | 0.53  | 0.27  | 0.47  | 1.64  | 1.54  | 1.18  | 1.85E-05      | 0.0001179 |
| ENSG00000266947 | RP11-799D4.4   | 1.68 | 2.43  | 2.28  | 3.83  | 8.77  | 6.45  | 10.06 | 1.13E-16      | 1.40E-15  |
| ENSG00000271882 | KB-1410C5.5    | 1.67 | 3.33  | 2.80  | 2.62  | 11.48 | 5.40  | 13.67 | 1.94E-06      | 1.35E-05  |
| ENSG00000213057 | C1orf220       | 1.66 | 0.70  | 0.71  | 1.09  | 2.78  | 2.40  | 2.41  | 1.69E-08      | 1.36E-07  |
| ENSG00000267519 | MIR24-2        | 1.66 | 1.59  | 2.14  | 2.34  | 6.28  | 5.69  | 6.09  | 8.07E-11      | 7.54E-10  |
| ENSG00000264968 | RP11-387H17.4  | 1.66 | 0.81  | 0.34  | 0.22  | 1.56  | 2.09  | 1.34  | 0.000202      | 0.0011603 |
| ENSG00000275367 | RP11-266K4.14  | 1.66 | 0.17  | 0.34  | 0.26  | 1.09  | 0.72  | 0.77  | 1.55E-05      | 9.95E-05  |
| ENSG00000258982 | RP11-638I2.4   | 1.65 | 4.14  | 6.46  | 2.60  | 14.26 | 10.36 | 15.67 | 1.04E-06      | 7.40E-06  |
| ENSG00000261971 | MMP25-AS1      | 1.65 | 6.80  | 6.36  | 8.54  | 24.81 | 17.70 | 20.36 | 3.24E-45      | 9.07E-44  |
| ENSG00000223745 | CCDC18-AS1     | 1.65 | 7.15  | 7.32  | 8.14  | 22.50 | 20.61 | 22.30 | 6.88E-40      | 1.73E-38  |
| ENSG00000226179 | LINC00685      | 1.65 | 4.57  | 3.07  | 2.01  | 13.03 | 8.96  | 8.08  | 1.48E-06      | 1.04E-05  |
| ENSG00000267758 | RP11-358B23.5  | 1.65 | 1.97  | 0.33  | 0.43  | 4.76  | 2.44  | 2.18  | 0.000279<br>7 | 0.001583  |
| ENSG00000251417 | RP11-1348G14.4 | 1.64 | 0.40  | 0.42  | 0.33  | 1.75  | 1.13  | 1.10  | 3.13E-05      | 0.0001955 |
| ENSG00000256312 | RP13-977J11.8  | 1.64 | 1.00  | 1.68  | 5.51  | 6.58  | 8.26  | 7.18  | 1.75E-05      | 0.0001121 |
| ENSG00000259514 | RP11-685G9.2   | 1.64 | 3.61  | 3.47  | 3.12  | 10.19 | 9.05  | 11.69 | 8.55E-09      | 7.07E-08  |
| ENSG00000225172 | RP11-16L9.2    | 1.64 | 0.54  | 0.15  | 0.00  | 0.60  | 0.93  | 1.20  | 0.000958<br>2 | 0.0050506 |
| ENSG00000240137 | ERICH6-AS1     | 1.64 | 0.95  | 1.79  | 0.52  | 3.63  | 2.93  | 3.40  | 2.28E-05      | 0.0001439 |
| ENSG00000177337 | DLGAP1-AS1     | 1.64 | 1.11  | 1.72  | 1.74  | 4.89  | 3.93  | 4.62  | 1.06E-09      | 9.28E-09  |
| ENSG00000239453 | SIDT1-AS1      | 1.64 | 5.89  | 7.43  | 4.63  | 12.91 | 18.66 | 22.77 | 5.07E-09      | 4.25E-08  |
| ENSG00000261596 | CTB-31N19.3    | 1.63 | 2.13  | 1.99  | 1.56  | 6.48  | 5.36  | 5.74  | 6.23E-07      | 4.51E-06  |
| ENSG00000281903 | AF127936.7     | 1.63 | 0.05  | 0.00  | 0.12  | 0.24  | 0.33  | 0.18  | 0.001146<br>6 | 0.0059835 |
| ENSG00000278156 | TSC22D1-AS1    | 1.63 | 0.28  | 0.48  | 0.56  | 1.61  | 0.99  | 1.44  | 1.02E-06      | 7.29E-06  |
| ENSG00000274895 | RP11-478J18.2  | 1.63 | 1.27  | 1.06  | 1.31  | 3.84  | 3.38  | 3.54  | 1.28E-09      | 1.12E-08  |
| ENSG00000268204 | CTD-3214H19.6  | 1.62 | 0.70  | 0.78  | 1.02  | 3.05  | 3.11  | 2.31  | 5.32E-05      | 0.000324  |
| ENSG00000254531 | FLJ20021       | 1.62 | 3.96  | 5.83  | 5.18  | 14.39 | 11.75 | 17.78 | 1.25E-10      | 1.15E-09  |
| ENSG00000228763 | LIMS1-AS1      | 1.62 | 0.41  | 0.34  | 0.45  | 0.90  | 3.38  | 2.27  | 0.001125<br>1 | 0.0058796 |
| ENSG00000260136 | CTD-2270L9.4   | 1.62 | 0.97  | 1.63  | 0.86  | 2.98  | 3.81  | 3.86  | 6.48E-06      | 4.31E-05  |
| ENSG00000270605 | RP5-1092A3.4   | 1.62 | 3.02  | 2.20  | 3.87  | 8.38  | 8.40  | 8.78  | 5.41E-13      | 5.67E-12  |
| ENSG00000235419 | AC010149.4     | 1.61 | 0.85  | 0.24  | 0.62  | 3.72  | 1.46  | 1.56  | 0.000394<br>9 | 0.0021913 |
| ENSG00000240143 | RP4-753P9.3    | 1.61 | 13.20 | 18.66 | 15.19 | 44.74 | 43.32 | 46.40 | 4.55E-12      | 4.55E-11  |
| ENSG00000262772 | RP11-353N14.2  | 1.61 | 2.08  | 3.22  | 6.98  | 11.16 | 10.04 | 9.91  | 9.99E-14      | 1.09E-12  |
| ENSG00000277744 | CTC-435M10.12  | 1.61 | 0.87  | 1.83  | 0.48  | 5.73  | 2.70  | 2.89  | 0.000281<br>2 | 0.0015899 |
| ENSG00000153363 | LINC00467      | 1.61 | 2.29  | 2.85  | 3.87  | 8.25  | 8.07  | 8.55  | 2.07E-20      | 2.95E-19  |
| ENSG00000223891 | OSER1-AS1      | 1.60 | 1.34  | 1.43  | 1.18  | 3.63  | 3.60  | 4.35  | 6.92E-09      | 5.75E-08  |
| ENSG00000214900 | LINC01588      | 1.60 | 0.33  | 0.25  | 0.36  | 0.92  | 0.96  | 0.81  | 2.71E-11      | 2.60E-10  |
| ENSG00000277182 | CTB-58E17.5    | 1.60 | 1.12  | 0.94  | 1.23  | 2.86  | 3.08  | 3.81  | 6.17E-08      | 4.80E-07  |
| ENSG00000233527 | ZNF529-AS1     | 1.60 | 4.92  | 4.22  | 4.73  | 12.52 | 13.39 | 13.30 | 5.78E-16      | 6.92E-15  |
| ENSG00000246339 | EXTL3-AS1      | 1.60 | 1.33  | 0.85  | 1.41  | 3.32  | 2.84  | 3.96  | 9.73E-12      | 9.57E-11  |
| ENSG00000258940 | RP11-407N17.5  | 1.60 | 0.58  | 0.73  | 1.11  | 4.26  | 1.93  | 1.75  | 1.21E-05      | 7.84E-05  |
| ENSG00000272144 | CTD-2035E11.5  | 1.59 | 2.24  | 1.88  | 1.44  | 6.96  | 4.82  | 4.75  | 3.27E-07      | 2.42E-06  |
| ENSG00000261067 | RP11-264B17.3  | 1.58 | 1.92  | 1.18  | 2.03  | 5.01  | 4.37  | 4.56  | 9.12E-16      | 1.09E-14  |
| ENSG00000272894 | RP5-1159O4.1   | 1.58 | 1.24  | 1.05  | 1.00  | 4.09  | 2.80  | 2.87  | 4.72E-07      | 3.45E-06  |
| ENSG00000229953 | RP11-284F21.7  | 1.58 | 18.32 | 15.18 | 15.06 | 49.80 | 41.79 | 42.76 | 7.32E-19      | 9.88E-18  |
| ENSG00000236502 | SIX3-AS1       | 1.57 | 0.17  | 0.71  | 1.87  | 2.61  | 1.75  | 2.25  | 6.26E-05      | 0.0003784 |

|                 |               |       |       |       |       |       |       |       |           |           |
|-----------------|---------------|-------|-------|-------|-------|-------|-------|-------|-----------|-----------|
| ENSG00000271646 | RP11-326I11.3 | 1.57  | 2.97  | 2.56  | 3.44  | 8.23  | 8.46  | 8.12  | 3.70E-14  | 4.13E-13  |
| ENSG00000259065 | RP5-1021I20.1 | 1.57  | 1.14  | 2.63  | 0.31  | 1.87  | 5.87  | 3.77  | 7.87E-05  | 0.0004699 |
| ENSG00000234084 | RP3-388E23.2  | 1.57  | 1.36  | 1.99  | 1.12  | 4.83  | 4.55  | 4.49  | 4.87E-05  | 0.0002978 |
| ENSG00000276633 | AJ011931.1    | 1.57  | 0.08  | 0.20  | 0.09  | 0.69  | 0.32  | 0.43  | 0.0009609 | 0.0050645 |
| ENSG00000267270 | PARD6G-AS1    | 1.56  | 0.17  | 0.14  | 0.28  | 0.61  | 0.75  | 0.47  | 4.71E-05  | 0.0002885 |
| ENSG00000274565 | CTD-3035K23.7 | 1.56  | 1.02  | 0.71  | 0.56  | 2.60  | 2.62  | 1.87  | 5.12E-05  | 0.0003125 |
| ENSG00000259448 | RP11-16E12.1  | 1.55  | 0.21  | 0.26  | 0.79  | 1.24  | 1.59  | 0.80  | 0.0001274 | 0.0007447 |
| ENSG00000227579 | RP1-35C21.2   | 1.55  | 0.00  | 0.18  | 0.69  | 1.37  | 0.86  | 0.69  | 0.0018967 | 0.0096095 |
| ENSG00000277020 | RP11-476H16.1 | 1.55  | 0.25  | 0.84  | 0.27  | 1.91  | 2.31  | 0.82  | 0.0009418 | 0.004973  |
| ENSG00000265474 | AC010761.9    | 1.55  | 1.50  | 1.58  | 1.65  | 6.59  | 3.10  | 5.81  | 7.25E-05  | 0.000435  |
| ENSG00000268947 | AD000684.2    | 1.54  | 3.08  | 2.10  | 1.91  | 6.54  | 5.76  | 7.44  | 1.88E-07  | 1.41E-06  |
| ENSG00000273061 | CDC37L1-AS1   | 1.54  | 6.06  | 4.02  | 4.57  | 12.95 | 10.20 | 18.33 | 2.70E-08  | 2.15E-07  |
| ENSG00000224165 | DNAJC27-AS1   | 1.54  | 0.97  | 1.02  | 0.88  | 2.39  | 2.71  | 2.72  | 2.70E-11  | 2.59E-10  |
| ENSG00000255495 | AC145124.2    | 1.54  | 0.14  | 0.36  | 0.16  | 0.79  | 0.89  | 0.79  | 0.0012795 | 0.0066326 |
| ENSG00000259536 | RP11-111A22.1 | 1.53  | 0.42  | 0.07  | 0.19  | 0.46  | 0.87  | 0.74  | 0.0005279 | 0.0028849 |
| ENSG00000276718 | RP1-102E24.10 | 1.53  | 3.26  | 1.65  | 5.03  | 8.24  | 8.08  | 9.74  | 1.46E-06  | 1.02E-05  |
| ENSG00000270820 | RP11-355B11.2 | 1.53  | 1.00  | 1.26  | 1.43  | 3.50  | 3.19  | 3.52  | 2.19E-07  | 1.64E-06  |
| ENSG00000267838 | AC008746.12   | 1.53  | 1.56  | 1.31  | 1.96  | 6.09  | 4.36  | 3.68  | 7.77E-06  | 5.13E-05  |
| ENSG00000253210 | RP11-809O17.1 | 1.52  | 2.67  | 5.09  | 5.60  | 13.02 | 9.25  | 13.12 | 9.00E-09  | 7.42E-08  |
| ENSG00000272941 | RP11-134L10.1 | 1.52  | 0.85  | 0.72  | 0.94  | 2.25  | 2.29  | 3.02  | 5.86E-05  | 0.0003555 |
| ENSG00000258949 | RP11-857B24.5 | 1.51  | 2.72  | 1.37  | 1.79  | 8.94  | 3.92  | 6.00  | 0.0002032 | 0.0011671 |
| ENSG00000273356 | RP11-804H8.6  | 1.51  | 0.47  | 0.64  | 0.52  | 1.15  | 1.96  | 1.78  | 3.09E-05  | 0.0001927 |
| ENSG00000249846 | RP11-77P16.4  | 1.51  | 0.20  | 0.25  | 0.44  | 0.65  | 0.82  | 1.42  | 0.0003856 | 0.0021416 |
| ENSG00000180422 | LINC00304     | 1.51  | 0.89  | 1.12  | 0.87  | 3.47  | 1.99  | 2.51  | 4.37E-09  | 3.68E-08  |
| ENSG00000277310 | RP11-699C17.1 | 1.51  | 1.38  | 1.54  | 2.02  | 3.52  | 6.63  | 5.58  | 0.0002033 | 0.0011677 |
| ENSG00000275294 | RP11-428O18.6 | 1.51  | 1.25  | 1.65  | 1.96  | 5.47  | 4.41  | 3.74  | 2.73E-06  | 1.88E-05  |
| ENSG00000251517 | RP11-109E24.1 | 1.50  | 0.35  | 0.44  | 0.00  | 0.57  | 1.43  | 0.77  | 0.0020768 | 0.0104646 |
| ENSG00000226239 | RP1-310O13.7  | 1.50  | 0.10  | 0.25  | 0.00  | 0.32  | 0.40  | 0.54  | 0.0028091 | 0.0138574 |
| ENSG00000249602 | RP11-98D18.3  | 1.50  | 7.17  | 7.75  | 5.64  | 16.84 | 21.13 | 18.10 | 1.87E-07  | 1.40E-06  |
| ENSG00000254028 | AC083843.2    | 1.50  | 0.23  | 0.19  | 0.76  | 1.01  | 2.14  | 1.02  | 0.0016135 | 0.008251  |
| ENSG00000235052 | RP1-150O5.3   | 1.50  | 6.43  | 10.46 | 13.22 | 30.57 | 25.22 | 22.27 | 1.11E-09  | 9.76E-09  |
| ENSG00000258725 | PRC1-AS1      | -1.50 | 1.96  | 1.28  | 0.60  | 0.24  | 0.34  | 0.36  | 0.0003456 | 0.0019312 |
| ENSG00000254208 | RP11-219B4.3  | -1.51 | 2.93  | 5.27  | 4.14  | 0.46  | 2.16  | 0.92  | 0.0004622 | 0.0025425 |
| ENSG00000225889 | AC074289.1    | -1.52 | 0.40  | 0.94  | 1.05  | 0.26  | 0.08  | 0.26  | 0.0004897 | 0.002686  |
| ENSG00000251396 | LINC01301     | -1.52 | 0.40  | 0.41  | 0.39  | 0.19  | 0.00  | 0.24  | 0.0005221 | 0.002855  |
| ENSG00000258511 | RP11-61O1.2   | -1.52 | 3.14  | 4.84  | 6.91  | 0.57  | 2.16  | 1.16  | 0.000496  | 0.002719  |
| ENSG00000260293 | RP11-715J22.6 | -1.53 | 1.32  | 1.49  | 1.57  | 0.46  | 0.29  | 0.65  | 7.79E-08  | 6.01E-07  |
| ENSG00000247675 | LRP4-AS1      | -1.53 | 1.33  | 1.02  | 1.20  | 0.27  | 0.63  | 0.13  | 0.0003824 | 0.0021251 |
| ENSG00000271803 | RP1-63M2.5    | -1.53 | 28.45 | 20.93 | 29.85 | 9.26  | 5.96  | 9.33  | 2.21E-09  | 1.90E-08  |



|                 |                |       |       |       |        |       |       |       |               |           |
|-----------------|----------------|-------|-------|-------|--------|-------|-------|-------|---------------|-----------|
| ENSG00000230289 | RP11-334J6.6   | -1.53 | 2.07  | 2.43  | 3.64   | 0.91  | 0.43  | 0.46  | 0.001213<br>6 | 0.0063059 |
| ENSG00000231221 | LINC01593      | -1.53 | 9.58  | 8.48  | 8.88   | 1.66  | 2.08  | 4.46  | 2.77E-05      | 0.0001738 |
| ENSG00000231769 | RP1-8B1.4      | -1.55 | 6.09  | 4.45  | 6.41   | 0.58  | 4.10  | 1.46  | 9.71E-06      | 6.36E-05  |
| ENSG00000269194 | AC006942.4     | -1.55 | 2.63  | 2.53  | 6.21   | 1.65  | 0.00  | 2.08  | 0.000375<br>3 | 0.0020877 |
| ENSG00000272808 | RP11-66B24.7   | -1.56 | 0.35  | 0.55  | 0.89   | 0.21  | 0.12  | 0.13  | 6.12E-05      | 0.0003699 |
| ENSG00000237921 | AC004543.2     | -1.56 | 3.18  | 4.46  | 4.08   | 0.58  | 1.64  | 0.59  | 0.000710<br>1 | 0.0038164 |
| ENSG00000264569 | RP13-650J16.1  | -1.56 | 1.93  | 2.32  | 2.13   | 0.30  | 0.57  | 0.61  | 0.000612<br>7 | 0.0033166 |
| ENSG00000234171 | RNASEH1-AS1    | -1.57 | 46.56 | 38.20 | 35.53  | 11.45 | 13.09 | 12.24 | 5.06E-22      | 7.68E-21  |
| ENSG00000239791 | AC002310.7     | -1.58 | 0.61  | 1.03  | 0.90   | 0.67  | 0.21  | 0.00  | 0.000460<br>3 | 0.0025325 |
| ENSG00000245857 | GS1-24F4.2     | -1.59 | 2.05  | 4.25  | 4.81   | 0.90  | 1.13  | 0.90  | 1.63E-06      | 1.14E-05  |
| ENSG00000267694 | RP11-691H4.4   | -1.59 | 12.96 | 11.89 | 12.11  | 4.74  | 2.03  | 4.34  | 3.30E-07      | 2.44E-06  |
| ENSG00000271936 | RP11-443B20.1  | -1.60 | 27.71 | 30.42 | 31.09  | 8.52  | 8.56  | 9.56  | 4.01E-18      | 5.26E-17  |
| ENSG00000227256 | MIS18A-AS1     | -1.61 | 4.32  | 2.99  | 3.08   | 1.39  | 0.79  | 0.56  | 5.49E-05      | 0.000334  |
| ENSG00000222012 | AC005481.5     | -1.61 | 0.91  | 0.67  | 0.87   | 0.31  | 0.06  | 0.38  | 4.04E-05      | 0.0002493 |
| ENSG00000233922 | AL133493.2     | -1.61 | 4.68  | 4.30  | 4.62   | 1.73  | 1.16  | 1.21  | 1.35E-17      | 1.74E-16  |
| ENSG00000206567 | AC022007.5     | -1.62 | 4.09  | 2.73  | 4.08   | 0.93  | 0.88  | 1.28  | 5.61E-09      | 4.69E-08  |
| ENSG00000239445 | ST3GAL6-AS1    | -1.62 | 3.25  | 3.90  | 3.58   | 1.02  | 0.72  | 1.03  | 2.49E-05      | 0.0001568 |
| ENSG00000272733 | KB-208E9.1     | -1.63 | 1.27  | 1.22  | 1.20   | 0.60  | 0.37  | 0.00  | 0.000567<br>7 | 0.003088  |
| ENSG00000282381 | RP11-328P23.4  | -1.63 | 8.50  | 8.80  | 7.20   | 2.87  | 1.69  | 2.17  | 1.16E-06      | 8.19E-06  |
| ENSG00000179935 | LINC00652      | -1.64 | 1.67  | 2.00  | 1.79   | 0.56  | 0.58  | 0.39  | 5.42E-08      | 4.23E-07  |
| ENSG00000230013 | RP11-217B7.3   | -1.65 | 1.61  | 2.98  | 1.42   | 0.35  | 0.33  | 0.36  | 0.000707      | 0.003801  |
| ENSG00000260423 | RP13-735L24.1  | -1.65 | 1.03  | 1.65  | 2.01   | 0.44  | 0.46  | 0.34  | 8.24E-08      | 6.35E-07  |
| ENSG00000224046 | AC005076.5     | -1.65 | 5.73  | 4.81  | 3.88   | 1.45  | 1.36  | 0.97  | 2.60E-06      | 1.79E-05  |
| ENSG00000245614 | DDX11-AS1      | -1.65 | 3.64  | 3.38  | 3.00   | 1.41  | 0.94  | 0.59  | 5.95E-09      | 4.96E-08  |
| ENSG00000253696 | KBTBD11-OT1    | -1.65 | 1.44  | 2.02  | 1.85   | 0.00  | 1.49  | 0.27  | 0.000385<br>4 | 0.0021408 |
| ENSG00000273162 | RP11-108L7.15  | -1.67 | 13.81 | 11.78 | 13.88  | 5.27  | 2.07  | 4.42  | 2.80E-11      | 2.69E-10  |
| ENSG00000261578 | RP11-21L23.2   | -1.67 | 0.37  | 0.16  | 0.36   | 0.00  | 0.05  | 0.15  | 0.000571<br>9 | 0.0031102 |
| ENSG00000261431 | RP4-616B8.4    | -1.68 | 8.37  | 4.40  | 4.61   | 0.00  | 1.08  | 2.31  | 0.000746<br>5 | 0.0039957 |
| ENSG00000204055 | RP11-247A12.2  | -1.68 | 0.34  | 0.43  | 0.66   | 0.19  | 0.00  | 0.09  | 0.000712      | 0.0038258 |
| ENSG00000269425 | AC007292.7     | -1.69 | 9.11  | 7.66  | 9.26   | 2.31  | 1.45  | 2.32  | 3.96E-05      | 0.0002443 |
| ENSG00000272263 | RP11-767C1.2   | -1.69 | 3.45  | 2.26  | 5.91   | 0.42  | 1.98  | 0.42  | 0.000123<br>2 | 0.0007223 |
| ENSG00000225439 | BOLA3-AS1      | -1.71 | 1.60  | 1.88  | 1.88   | 0.35  | 0.88  | 0.24  | 6.95E-06      | 4.61E-05  |
| ENSG00000233016 | SNHG7          | -1.71 | 83.22 | 78.52 | 85.68  | 24.58 | 21.36 | 23.62 | 4.55E-86      | 2.62E-84  |
| ENSG00000272644 | RP11-3304.1    | -1.72 | 5.58  | 6.49  | 9.44   | 2.82  | 2.65  | 0.47  | 6.56E-06      | 4.36E-05  |
| ENSG00000231607 | DLEU2          | -1.73 | 21.36 | 25.05 | 28.97  | 8.04  | 6.59  | 6.18  | 2.75E-46      | 7.92E-45  |
| ENSG00000255026 | RP11-326C3.2   | -1.74 | 75.72 | 76.67 | 100.65 | 29.43 | 18.53 | 21.86 | 1.05E-32      | 2.21E-31  |
| ENSG00000254510 | RP11-867G23.10 | -1.74 | 21.32 | 30.91 | 31.57  | 7.58  | 7.43  | 7.31  | 7.01E-22      | 1.06E-20  |
| ENSG00000277342 | RP11-843B15.4  | -1.75 | 8.16  | 8.74  | 9.81   | 3.66  | 3.06  | 0.82  | 3.71E-07      | 2.73E-06  |
| ENSG00000250917 | RP4-785G19.5   | -1.75 | 4.09  | 4.47  | 3.60   | 1.79  | 1.69  | 0.00  | 6.44E-05      | 0.0003886 |
| ENSG00000227036 | LINC00511      | -1.76 | 0.52  | 0.73  | 0.45   | 0.25  | 0.09  | 0.10  | 2.56E-07      | 1.90E-06  |
| ENSG00000262172 | CTD-2529O21.1  | -1.77 | 11.04 | 9.65  | 11.67  | 3.87  | 1.82  | 2.44  | 2.53E-07      | 1.89E-06  |
| ENSG00000248774 | RP11-798M19.3  | -1.77 | 6.38  | 2.21  | 3.72   | 0.41  | 1.16  | 0.83  | 4.93E-05      | 0.0003013 |
| ENSG00000176659 | C20orf197      | -1.79 | 19.76 | 19.08 | 22.78  | 5.42  | 5.47  | 5.30  | 2.57E-29      | 4.92E-28  |
| ENSG00000212719 | C17orf51       | -1.79 | 20.20 | 21.12 | 20.13  | 5.63  | 5.57  | 5.08  | 4.22E-60      | 1.62E-58  |
| ENSG00000260190 | RP11-229P13.25 | -1.81 | 1.67  | 2.21  | 1.84   | 0.78  | 0.00  | 0.53  | 9.48E-05      | 0.0005625 |
| ENSG00000233056 | ERVH48-1       | -1.81 | 66.68 | 72.20 | 73.72  | 20.30 | 18.17 | 17.18 | 1.23E-65      | 5.21E-64  |

|                 |               |       |        |        |        |       |       |       |           |           |
|-----------------|---------------|-------|--------|--------|--------|-------|-------|-------|-----------|-----------|
| ENSG00000269534 | CTC-453G23.5  | -1.84 | 1.94   | 1.30   | 2.13   | 0.64  | 0.00  | 0.64  | 4.54E-05  | 0.0002785 |
| ENSG00000268555 | RP11-678G14.3 | -1.84 | 17.43  | 21.08  | 23.76  | 4.37  | 6.17  | 5.14  | 1.44E-18  | 1.92E-17  |
| ENSG00000262712 | RP11-295D4.1  | -1.84 | 2.11   | 3.21   | 2.98   | 0.44  | 0.83  | 0.67  | 3.67E-08  | 2.90E-07  |
| ENSG00000257497 | RP11-585P4.5  | -1.85 | 4.62   | 4.88   | 3.63   | 0.72  | 1.09  | 1.31  | 4.89E-09  | 4.11E-08  |
| ENSG00000272942 | CTA-246H3.12  | -1.85 | 5.76   | 1.76   | 4.61   | 1.44  | 0.27  | 0.87  | 4.80E-06  | 3.22E-05  |
| ENSG00000281344 | HELLPAR       | -1.85 | 0.04   | 0.03   | 0.06   | 0.01  | 0.01  | 0.01  | 2.39E-10  | 2.19E-09  |
| ENSG00000226791 | AC109826.1    | -1.85 | 23.46  | 27.70  | 22.55  | 5.51  | 6.43  | 6.58  | 2.32E-29  | 4.45E-28  |
| ENSG00000225964 | NRIR          | -1.85 | 1.21   | 2.37   | 1.11   | 0.44  | 0.00  | 0.44  | 8.91E-05  | 0.0005302 |
| ENSG00000251556 | RP11-118M9.3  | -1.86 | 4.90   | 5.24   | 5.89   | 1.47  | 1.38  | 0.49  | 1.07E-05  | 6.97E-05  |
| ENSG00000260500 | CTD-3193O13.1 | -1.86 | 3.48   | 6.50   | 5.53   | 3.81  | 0.00  | 1.28  | 1.07E-05  | 6.99E-05  |
| ENSG00000237356 | AL163953.3    | -1.86 | 5.92   | 6.43   | 6.41   | 1.30  | 1.41  | 1.91  | 1.82E-13  | 1.95E-12  |
| ENSG00000276384 | RP11-186B7.7  | -1.88 | 3.21   | 4.25   | 5.56   | 1.51  | 1.42  | 0.00  | 2.96E-05  | 0.0001853 |
| ENSG00000222043 | AC079305.10   | -1.90 | 2.74   | 1.98   | 1.73   | 0.00  | 0.00  | 1.30  | 0.0001676 | 0.00097   |
| ENSG00000260260 | SNHG19        | -1.90 | 147.53 | 148.56 | 173.14 | 47.66 | 34.22 | 33.49 | 3.30E-31  | 6.68E-30  |
| ENSG00000281849 | RP13-465B17.4 | -1.91 | 2.83   | 4.42   | 3.11   | 0.00  | 2.08  | 0.45  | 3.63E-05  | 0.0002257 |
| ENSG00000269951 | RP11-797A18.6 | -1.91 | 6.98   | 1.71   | 6.73   | 2.55  | 0.30  | 0.64  | 1.85E-06  | 1.29E-05  |
| ENSG00000257167 | TMPO-AS1      | -1.91 | 10.49  | 16.70  | 18.79  | 4.22  | 3.13  | 3.54  | 3.90E-30  | 7.67E-29  |
| ENSG00000215458 | AATBC         | -1.92 | 0.60   | 0.64   | 0.66   | 0.09  | 0.17  | 0.13  | 1.12E-06  | 7.96E-06  |
| ENSG00000259343 | TMC3-AS1      | -1.92 | 4.78   | 5.48   | 3.35   | 0.79  | 1.05  | 1.12  | 3.69E-09  | 3.12E-08  |
| ENSG00000254703 | SENCR         | -1.92 | 5.42   | 8.11   | 8.63   | 1.49  | 2.02  | 1.50  | 1.49E-11  | 1.45E-10  |
| ENSG00000253174 | RP11-360L9.7  | -1.92 | 1.97   | 0.97   | 0.91   | 0.18  | 0.00  | 0.55  | 5.50E-05  | 0.0003346 |
| ENSG00000228649 | AC005682.5    | -1.93 | 11.17  | 8.95   | 9.84   | 2.29  | 2.23  | 2.55  | 9.40E-21  | 1.36E-19  |
| ENSG00000276571 | AC002550.6    | -1.93 | 6.45   | 3.34   | 6.56   | 0.54  | 2.05  | 0.55  | 1.08E-05  | 7.02E-05  |
| ENSG00000281398 | SNHG4         | -1.95 | 77.88  | 52.76  | 61.60  | 16.82 | 13.62 | 14.70 | 9.66E-54  | 3.23E-52  |
| ENSG00000268240 | RP11-678G14.4 | -1.96 | 0.82   | 0.50   | 0.16   | 0.00  | 0.08  | 0.08  | 9.19E-05  | 0.0005459 |
| ENSG00000163597 | SNHG16        | -1.97 | 59.74  | 64.55  | 61.64  | 13.92 | 14.60 | 15.11 | 3.21E-102 | 2.30E-100 |
| ENSG00000227848 | SUCLA2-AS1    | -1.97 | 1.77   | 3.28   | 5.46   | 0.78  | 0.37  | 0.39  | 1.59E-05  | 0.0001024 |
| ENSG00000268649 | MIR296        | -1.97 | 5.27   | 5.26   | 3.26   | 0.72  | 1.02  | 0.73  | 1.68E-06  | 1.17E-05  |
| ENSG00000276672 | RP11-142E9.1  | -1.99 | 4.85   | 4.89   | 5.20   | 1.43  | 1.18  | 0.84  | 3.42E-20  | 4.84E-19  |
| ENSG00000265933 | LINC00668     | -2.00 | 0.16   | 0.34   | 0.40   | 0.04  | 0.00  | 0.09  | 3.69E-05  | 0.0002292 |
| ENSG00000248015 | AC005329.7    | -2.01 | 2.79   | 3.78   | 3.80   | 0.66  | 0.45  | 1.33  | 2.88E-14  | 3.23E-13  |
| ENSG00000269846 | RP4-621N11.2  | -2.01 | 0.98   | 0.71   | 1.39   | 0.15  | 0.00  | 0.31  | 3.15E-05  | 0.0001965 |
| ENSG00000255717 | SNHG1         | -2.02 | 204.15 | 190.86 | 216.01 | 48.77 | 48.40 | 41.65 | 4.34E-180 | 7.30E-178 |
| ENSG00000227301 | RP11-384P7.5  | -2.02 | 1.20   | 1.29   | 1.13   | 0.19  | 0.35  | 0.00  | 2.91E-05  | 0.0001818 |
| ENSG00000176124 | DLEU1         | -2.03 | 4.26   | 4.11   | 4.13   | 1.03  | 0.92  | 0.84  | 1.08E-32  | 2.27E-31  |
| ENSG00000270988 | RP11-439C15.5 | -2.03 | 1.57   | 3.31   | 2.60   | 0.43  | 0.00  | 0.43  | 4.62E-05  | 0.0002831 |
| ENSG00000271989 | RP4-736L20.3  | -2.03 | 1.23   | 1.44   | 1.89   | 0.27  | 0.00  | 0.27  | 4.48E-05  | 0.0002752 |
| ENSG00000259959 | RP11-121C2.2  | -2.06 | 3.66   | 4.79   | 4.75   | 1.02  | 0.86  | 0.92  | 1.37E-18  | 1.82E-17  |
| ENSG00000272259 | RP11-305P22.9 | -2.06 | 1.74   | 0.71   | 0.93   | 0.22  | 0.15  | 0.22  | 2.24E-08  | 1.80E-07  |
| ENSG00000276390 | RP1-197B17.5  | -2.07 | 4.92   | 3.82   | 5.83   | 0.83  | 1.17  | 0.42  | 1.01E-06  | 7.22E-06  |
| ENSG00000225632 | RP5-997D24.3  | -2.09 | 24.82  | 34.78  | 41.86  | 7.34  | 6.17  | 7.59  | 1.31E-28  | 2.45E-27  |
| ENSG00000232233 | RP11-573D15.2 | -2.10 | 4.70   | 4.31   | 3.76   | 1.17  | 0.99  | 0.47  | 7.51E-12  | 7.43E-11  |
| ENSG00000254682 | RP11-660L16.2 | -2.10 | 69.02  | 66.01  | 58.58  | 15.46 | 13.65 | 11.76 | 3.85E-32  | 7.96E-31  |
| ENSG00000266651 | RP11-138I1.3  | -2.11 | 46.32  | 35.16  | 46.75  | 7.76  | 11.28 | 7.11  | 1.06E-15  | 1.25E-14  |
| ENSG00000242540 | AC010729.1    | -2.13 | 2.77   | 3.15   | 5.21   | 1.07  | 1.01  | 0.18  | 6.75E-09  | 5.61E-08  |
| ENSG00000234614 | AL450992.2    | -2.14 | 8.12   | 13.65  | 8.51   | 0.85  | 2.79  | 2.14  | 1.30E-09  | 1.13E-08  |
| ENSG00000246985 | SOCS2-AS1     | -2.16 | 0.67   | 0.56   | 0.56   | 0.17  | 0.05  | 0.06  | 7.87E-07  | 5.65E-06  |
| ENSG00000267480 | RP11-703I16.1 | -2.16 | 2.23   | 6.86   | 3.68   | 0.81  | 0.00  | 1.23  | 1.51E-06  | 1.06E-05  |
| ENSG00000275632 | RP5-967N21.11 | -2.16 | 10.08  | 9.10   | 9.86   | 2.05  | 1.93  | 1.24  | 7.31E-10  | 6.47E-09  |
| ENSG00000235501 | RP4-639F20.1  | -2.18 | 2.32   | 1.95   | 1.91   | 0.42  | 0.20  | 0.21  | 1.06E-06  | 7.54E-06  |
| ENSG00000215417 | MIR17HG       | -2.19 | 8.62   | 6.12   | 8.20   | 1.72  | 1.39  | 1.36  | 4.11E-25  | 6.86E-24  |
| ENSG00000242125 | SNHG3         | -2.19 | 95.25  | 68.05  | 80.59  | 17.47 | 16.39 | 14.80 | 7.73E-119 | 6.87E-117 |

|                 |                |       |        |        |        |       |       |       |           |           |
|-----------------|----------------|-------|--------|--------|--------|-------|-------|-------|-----------|-----------|
| ENSG00000259408 | RP11-3D4.3     | -2.21 | 0.61   | 2.05   | 2.01   | 0.00  | 0.63  | 0.00  | 8.01E-06  | 5.28E-05  |
| ENSG00000274667 | RP11-31H5.3    | -2.22 | 4.31   | 2.90   | 4.12   | 1.26  | 0.89  | 0.00  | 2.19E-07  | 1.64E-06  |
| ENSG00000261924 | CTD-2561B21.5  | -2.22 | 0.33   | 0.59   | 0.92   | 0.15  | 0.00  | 0.15  | 3.43E-07  | 2.53E-06  |
| ENSG00000232053 | AC009784.3     | -2.24 | 5.48   | 3.33   | 3.02   | 1.00  | 0.47  | 0.50  | 3.91E-10  | 3.52E-09  |
| ENSG00000233776 | LINC01251      | -2.24 | 7.65   | 7.44   | 6.20   | 2.65  | 0.83  | 0.44  | 1.45E-08  | 1.18E-07  |
| ENSG00000234215 | RP5-942I16.1   | -2.25 | 2.83   | 1.90   | 1.56   | 0.31  | 0.29  | 0.00  | 4.35E-06  | 2.94E-05  |
| ENSG00000235026 | DPP10-AS1      | -2.27 | 30.86  | 31.73  | 34.41  | 6.47  | 5.27  | 6.30  | 9.37E-30  | 1.82E-28  |
| ENSG00000261373 | VPS9D1-AS1     | -2.28 | 45.74  | 43.15  | 53.68  | 11.01 | 7.02  | 9.00  | 1.98E-53  | 6.60E-52  |
| ENSG00000234160 | RP11-613M10.6  | -2.28 | 95.41  | 85.91  | 105.80 | 18.55 | 16.06 | 17.95 | 2.66E-27  | 4.77E-26  |
| ENSG00000227028 | SLC8A1-AS1     | -2.34 | 0.14   | 0.35   | 0.30   | 0.05  | 0.00  | 0.05  | 2.52E-07  | 1.87E-06  |
| ENSG00000273342 | KB-1440D3.14   | -2.37 | 8.43   | 9.69   | 12.21  | 1.46  | 1.37  | 1.47  | 2.34E-10  | 2.14E-09  |
| ENSG00000280018 | CH507-154B10.2 | -2.37 | 0.77   | 0.74   | 1.81   | 0.12  | 0.23  | 0.00  | 4.55E-07  | 3.33E-06  |
| ENSG00000254910 | RP11-326C3.7   | -2.37 | 6.98   | 6.29   | 4.94   | 1.09  | 1.54  | 0.00  | 7.73E-08  | 5.97E-07  |
| ENSG00000235590 | GNAS-AS1       | -2.38 | 3.74   | 3.78   | 3.24   | 0.70  | 0.55  | 0.53  | 1.21E-18  | 1.62E-17  |
| ENSG00000273230 | RP11-1246C19.1 | -2.41 | 22.36  | 31.46  | 43.34  | 6.31  | 4.40  | 5.50  | 1.21E-62  | 4.86E-61  |
| ENSG00000268262 | CTC-246B18.8   | -2.42 | 4.01   | 4.12   | 2.95   | 0.73  | 0.46  | 0.25  | 3.54E-09  | 3.00E-08  |
| ENSG00000277491 | RP11-676J12.9  | -2.43 | 3.60   | 6.05   | 8.37   | 0.44  | 0.41  | 1.33  | 1.20E-08  | 9.84E-08  |
| ENSG00000230649 | AC024084.1     | -2.43 | 4.73   | 6.50   | 7.10   | 1.41  | 1.33  | 0.00  | 1.32E-08  | 1.08E-07  |
| ENSG00000234753 | FOXP4-AS1      | -2.43 | 5.44   | 4.75   | 6.69   | 0.46  | 0.43  | 2.08  | 1.16E-11  | 1.13E-10  |
| ENSG00000266402 | SNHG25         | -2.48 | 26.03  | 20.11  | 25.56  | 3.09  | 2.18  | 5.44  | 1.59E-13  | 1.71E-12  |
| ENSG00000235806 | RP4-646N3.1    | -2.49 | 1.82   | 1.11   | 1.46   | 0.18  | 0.17  | 0.00  | 2.30E-07  | 1.72E-06  |
| ENSG00000272599 | RP11-152N13.16 | -2.50 | 12.63  | 9.76   | 8.75   | 2.23  | 0.63  | 2.25  | 5.78E-17  | 7.24E-16  |
| ENSG00000178248 | AP000345.1     | -2.51 | 0.87   | 1.04   | 1.36   | 0.00  | 0.38  | 0.00  | 2.05E-07  | 1.54E-06  |
| ENSG00000226950 | DANCR          | -2.51 | 208.83 | 212.13 | 214.10 | 34.82 | 34.00 | 33.67 | 1.10E-185 | 1.93E-183 |
| ENSG00000239268 | RP11-384F7.2   | -2.52 | 1.77   | 6.23   | 6.22   | 0.39  | 0.36  | 0.39  | 2.22E-08  | 1.78E-07  |
| ENSG00000260442 | ATP2A1-AS1     | -2.53 | 15.77  | 14.67  | 13.30  | 2.21  | 1.73  | 2.22  | 6.18E-16  | 7.39E-15  |
| ENSG00000259219 | CTD-3076O17.2  | -2.54 | 1.06   | 0.69   | 1.26   | 0.09  | 0.08  | 0.09  | 1.62E-08  | 1.31E-07  |
| ENSG00000259834 | RP11-284N8.3   | -2.57 | 3.37   | 3.26   | 4.21   | 0.25  | 0.70  | 0.74  | 3.90E-20  | 5.52E-19  |
| ENSG00000255571 | MIR9-3HG       | -2.57 | 4.65   | 3.76   | 4.36   | 0.79  | 0.44  | 0.73  | 1.14E-34  | 2.51E-33  |
| ENSG00000268592 | RAET1E-AS1     | -2.58 | 1.62   | 1.63   | 3.20   | 0.35  | 0.33  | 0.00  | 7.12E-09  | 5.91E-08  |
| ENSG00000235033 | RP11-61I13.3   | -2.63 | 1.85   | 1.99   | 2.54   | 0.31  | 0.35  | 0.22  | 1.32E-22  | 2.04E-21  |
| ENSG00000236856 | AC105393.1     | -2.64 | 4.63   | 3.29   | 2.75   | 0.00  | 0.37  | 0.39  | 2.77E-08  | 2.21E-07  |
| ENSG00000276292 | RP11-33N14.5   | -2.67 | 10.10  | 9.26   | 13.14  | 0.00  | 1.89  | 1.01  | 5.21E-09  | 4.36E-08  |
| ENSG00000233589 | RP4-694A7.2    | -2.69 | 2.85   | 3.25   | 3.36   | 0.22  | 0.42  | 0.23  | 3.24E-10  | 2.94E-09  |
| ENSG00000272798 | CTA-390C10.9   | -2.70 | 3.24   | 1.91   | 2.50   | 0.00  | 0.33  | 0.00  | 7.21E-08  | 5.58E-07  |
| ENSG00000225218 | AP001628.6     | -2.70 | 9.61   | 2.88   | 5.29   | 0.00  | 0.00  | 0.76  | 6.59E-08  | 5.11E-07  |
| ENSG00000261786 | RP4-555D20.2   | -2.80 | 0.50   | 0.49   | 0.51   | 0.00  | 0.04  | 0.09  | 5.35E-10  | 4.79E-09  |
| ENSG00000229418 | RP11-35J23.1   | -2.84 | 1.52   | 0.77   | 0.56   | 0.00  | 0.10  | 0.00  | 9.46E-09  | 7.79E-08  |
| ENSG00000196758 | AC079612.1     | -2.85 | 0.79   | 0.93   | 0.47   | 0.06  | 0.11  | 0.00  | 2.52E-10  | 2.30E-09  |
| ENSG00000259287 | RP11-3D4.2     | -2.87 | 6.26   | 4.39   | 5.36   | 0.38  | 0.00  | 1.15  | 5.23E-11  | 4.94E-10  |
| ENSG00000243479 | MNX1-AS1       | -2.89 | 23.48  | 24.17  | 23.37  | 3.30  | 1.94  | 3.32  | 3.86E-35  | 8.64E-34  |
| ENSG00000230526 | RP11-472G21.2  | -2.94 | 63.70  | 82.37  | 75.47  | 7.76  | 9.61  | 8.23  | 4.64E-47  | 1.35E-45  |
| ENSG00000235688 | AC116614.1     | -2.94 | 15.96  | 18.00  | 18.78  | 1.59  | 2.25  | 1.60  | 1.56E-20  | 2.24E-19  |
| ENSG00000226806 | AC011893.3     | -2.98 | 36.97  | 36.65  | 41.17  | 5.07  | 4.12  | 3.95  | 3.22E-70  | 1.45E-68  |
| ENSG00000176912 | TYMSOS         | -2.98 | 9.62   | 10.78  | 13.68  | 0.88  | 1.24  | 1.33  | 1.08E-22  | 1.67E-21  |
| ENSG00000249084 | RP11-376O6.2   | -3.01 | 2.08   | 2.84   | 4.58   | 0.00  | 0.00  | 0.57  | 1.89E-10  | 1.73E-09  |
| ENSG00000272512 | RP11-54O7.17   | -3.06 | 13.97  | 9.62   | 14.66  | 1.85  | 0.87  | 1.35  | 3.31E-39  | 8.18E-38  |
| ENSG00000283638 | MIR92A2        | -3.15 | 1.37   | 0.89   | 1.34   | 0.00  | 0.21  | 0.11  | 3.64E-15  | 4.23E-14  |
| ENSG00000229191 | RP11-168O16.1  | -3.18 | 2.84   | 2.58   | 2.15   | 0.06  | 0.17  | 0.62  | 1.73E-21  | 2.58E-20  |
| ENSG00000260947 | RP11-384P7.7   | -3.20 | 1.39   | 2.42   | 2.08   | 0.18  | 0.23  | 0.06  | 6.70E-19  | 9.06E-18  |
| ENSG00000268798 | CTB-25B13.5    | -3.23 | 9.96   | 12.11  | 14.09  | 2.14  | 1.10  | 0.39  | 1.10E-27  | 2.00E-26  |
| ENSG00000257060 | RP11-266O8.1   | -3.31 | 0.32   | 0.67   | 0.59   | 0.00  | 0.00  | 0.00  | 5.27E-11  | 4.98E-10  |
| ENSG00000260302 | RP11-973H7.1   | -3.39 | 21.97  | 20.15  | 24.53  | 1.85  | 2.06  | 1.53  | 1.45E-46  | 4.18E-45  |
| ENSG00000229941 | AC012499.1     | -3.57 | 1.58   | 3.77   | 4.65   | 0.00  | 0.00  | 0.00  | 4.87E-13  | 5.12E-12  |
| ENSG00000230830 | ARPP21-AS1     | -3.58 | 10.10  | 5.76   | 6.36   | 0.40  | 0.00  | 0.40  | 1.99E-16  | 2.44E-15  |

---

|                 |                |       |       |       |       |      |      |      |           |           |
|-----------------|----------------|-------|-------|-------|-------|------|------|------|-----------|-----------|
| ENSG00000232487 | RASA3-IT1      | -3.70 | 44.26 | 47.16 | 45.33 | 1.13 | 3.72 | 4.55 | 2.56E-38  | 6.22E-37  |
| ENSG00000267665 | RP11-13K12.2   | -3.71 | 1.23  | 1.39  | 1.54  | 0.09 | 0.04 | 0.05 | 7.00E-22  | 1.06E-20  |
| ENSG00000228203 | RNF144A-AS1    | -3.72 | 1.14  | 2.02  | 2.41  | 0.14 | 0.09 | 0.05 | 3.12E-25  | 5.23E-24  |
| ENSG00000245248 | USP2-AS1       | -3.81 | 2.01  | 2.49  | 1.90  | 0.36 | 0.04 | 0.05 | 9.23E-29  | 1.74E-27  |
| ENSG00000236117 | RP4-754E20_A.5 | -3.83 | 3.91  | 5.19  | 5.89  | 0.23 | 0.00 | 0.23 | 1.96E-19  | 2.71E-18  |
| ENSG00000260123 | RP11-326A19.4  | -3.86 | 21.95 | 24.51 | 21.64 | 1.44 | 1.35 | 0.72 | 6.10E-35  | 1.36E-33  |
| ENSG00000258748 | CTD-2223O18.1  | -3.88 | 8.04  | 13.88 | 15.38 | 0.93 | 0.44 | 0.00 | 2.10E-21  | 3.12E-20  |
| ENSG00000256008 | RP11-728G15.1  | -4.14 | 12.06 | 11.90 | 14.24 | 0.19 | 0.72 | 0.77 | 1.08E-38  | 2.65E-37  |
| ENSG00000225518 | RP11-396C23.2  | -4.21 | 5.96  | 6.61  | 4.72  | 0.00 | 0.25 | 0.00 | 1.23E-21  | 1.84E-20  |
| ENSG00000236656 | RP11-144L1.4   | -4.23 | 1.13  | 1.46  | 1.74  | 0.00 | 0.00 | 0.00 | 1.70E-19  | 2.35E-18  |
| ENSG00000227459 | AC079612.2     | -4.65 | 24.16 | 33.07 | 26.61 | 1.23 | 0.58 | 0.00 | 5.56E-35  | 1.24E-33  |
| ENSG00000272789 | RP11-286H15.1  | -4.72 | 91.58 | 78.16 | 81.63 | 4.78 | 1.42 | 2.79 | 4.43E-110 | 3.54E-108 |
| ENSG00000259200 | RP11-718O11.1  | -5.00 | 8.32  | 9.58  | 11.36 | 0.17 | 0.32 | 0.00 | 6.54E-43  | 1.75E-41  |
| ENSG00000274840 | RP11-320G10.1  | -5.04 | 15.58 | 24.25 | 19.69 | 0.00 | 0.00 | 0.00 | 5.34E-31  | 1.07E-29  |

---

**Table S2.** List of lncRNAs regulated in the same direction both in Jurkat cells after PMA/ionomycin treatment and in FL samples.

| Geneid          | Gene name      | logFC | Jurkat |        |       | FL    |      |
|-----------------|----------------|-------|--------|--------|-------|-------|------|
|                 |                |       | NS     | SW4DR  | logFC | FL    | GCB  |
| ENSG00000204054 | LINC00963      | 7.45  | 0.05   | 10.59  | 5.03  | 1.10  | 0.03 |
| ENSG00000233093 | LINC00892      | 6.55  | 3.47   | 302.96 | 7.39  | 2.72  | 0.01 |
| ENSG00000178977 | LINC00324      | 4.37  | 1.46   | 28.90  | 1.04  | 2.97  | 1.27 |
| ENSG00000274536 | MIR223HG       | 4.20  | 13.39  | 219.45 | 3.69  | 8.35  | 0.43 |
| ENSG00000267414 | RP11-456K23.1  | 3.12  | 0.12   | 1.71   | 0.56  | 1.54  | 0.91 |
| ENSG00000232533 | AC093673.5     | 2.69  | 10.44  | 62.61  | 1.42  | 4.41  | 1.45 |
| ENSG00000260231 | JHDM1D-AS1     | 2.52  | 1.02   | 5.52   | 1.81  | 1.98  | 0.48 |
| ENSG00000245532 | NEAT1          | 2.49  | 19.00  | 98.22  | 1.10  | 17.58 | 7.01 |
| ENSG00000246898 | LINC00920      | 2.24  | 2.58   | 11.41  | 6.27  | 0.75  | 0.01 |
| ENSG00000234883 | MIR155HG       | 2.13  | 1.11   | 4.97   | 1.61  | 5.25  | 1.46 |
| ENSG00000271151 | RP11-394I13.2  | 2.05  | 0.78   | 3.49   | 0.88  | 0.76  | 0.36 |
| ENSG00000261366 | MANEA-AS1      | 1.90  | 0.76   | 2.90   | 1.14  | 1.08  | 0.42 |
| ENSG00000206028 | CTA-373H7.7    | 1.88  | 0.33   | 1.29   | 2.43  | 11.25 | 1.63 |
| ENSG00000256576 | RP13-977J11.2  | 1.69  | 17.79  | 53.05  | 3.82  | 1.93  | 0.11 |
| ENSG00000266947 | RP11-799D4.4   | 1.68  | 2.85   | 8.43   | 2.54  | 0.45  | 0.07 |
| ENSG00000223891 | OSER1-AS1      | 1.60  | 1.32   | 3.86   | 0.56  | 0.55  | 0.33 |
| ENSG00000272144 | CTD-2035E11.5  | 1.59  | 1.86   | 5.51   | 1.27  | 0.93  | 0.33 |
| ENSG00000267838 | AC008746.12    | 1.53  | 1.61   | 4.71   | 1.03  | 0.80  | 0.33 |
| ENSG00000271803 | RP1-63M2.5     | -1.53 | 26.41  | 8.18   | -3.49 | 0.11  | 1.47 |
| ENSG00000273162 | RP11-108L7.15  | -1.67 | 13.16  | 3.92   | -1.55 | 0.46  | 1.23 |
| ENSG00000261431 | RP4-616B8.4    | -1.68 | 5.79   | 1.13   | -1.08 | 0.29  | 0.57 |
| ENSG00000228649 | AC005682.5     | -1.93 | 9.98   | 2.35   | -0.62 | 0.58  | 0.80 |
| ENSG00000255717 | SNHG1          | -2.02 | 203.68 | 46.27  | -1.20 | 0.67  | 1.41 |
| ENSG00000266651 | RP11-138I1.3   | -2.11 | 42.74  | 8.72   | -1.22 | 0.68  | 1.41 |
| ENSG00000215417 | MIR17HG        | -2.19 | 7.65   | 1.49   | -1.66 | 0.27  | 0.84 |
| ENSG00000273230 | RP11-1246C19.1 | -2.41 | 32.39  | 5.40   | -0.55 | 0.62  | 0.80 |
| ENSG00000261786 | RP4-555D20.2   | -2.80 | 0.50   | 0.04   | -1.46 | 0.18  | 0.52 |

**Table S3.** List of the genes with the strongest positive or negative expression correlation (pearson) with LINC00892 in all cell types analyzed by Monaco et al. (Monaco et al. Cell Reports). Genes marked with an asterisk are known to be high expressed in CD4+ Follicular T helper cells.

| Gene      | Pearson | p-value  |
|-----------|---------|----------|
| LINC00892 | 1       | 0        |
| CCR4*     | 0.858   | 3.50E-34 |
| CD40LG*   | 0.858   | 3.73E-34 |
| ZDHHC11B  | 0.833   | 1.66E-30 |
| ICOS*     | 0.832   | 2.15E-30 |
| CLIC5     | 0.827   | 9.79E-30 |
| PDGFB     | 0.811   | 7.79E-28 |
| PDCD1*    | 0.809   | 1.35E-27 |
| INPP4B    | 0.808   | 1.73E-27 |
| CCR8      | 0.796   | 3.57E-26 |
| EMBP1     | 0.791   | 1.10E-25 |
| ZNF831    | 0.790   | 1.53E-25 |
| RNF214    | 0.787   | 2.89E-25 |
| FBXL8     | 0.786   | 3.86E-25 |
| CLDND1    | 0.784   | 6.35E-25 |
| TNFRSF25  | 0.784   | 6.53E-25 |
| RPL5P13   | 0.783   | 7.89E-25 |
| IL7R      | 0.782   | 9.80E-25 |
| CDC14A    | 0.781   | 1.10E-24 |
| UBASH3A   | 0.780   | 1.42E-24 |
| CYBB      | -0.684  | 4.66E-17 |
| NCF1B     | -0.685  | 4.12E-17 |
| RAB31     | -0.686  | 3.93E-17 |
| PIK3AP1   | -0.689  | 2.44E-17 |
| RHOQ      | -0.690  | 1.99E-17 |
| CORO1C    | -0.692  | 1.62E-17 |
| P2RX1     | -0.692  | 1.62E-17 |
| CBFA2T3   | -0.693  | 1.37E-17 |
| PECAM1    | -0.693  | 1.26E-17 |
| MEF2C     | -0.694  | 1.18E-17 |
| NCF1C     | -0.694  | 1.15E-17 |
| PLCG2     | -0.696  | 7.75E-18 |
| CD68      | -0.697  | 6.70E-18 |
| GAPT      | -0.701  | 3.83E-18 |
| HHEX      | -0.703  | 2.99E-18 |
| METTL7A   | -0.709  | 1.12E-18 |
| BTk       | -0.715  | 3.97E-19 |
| FES       | -0.723  | 1.12E-19 |
| LYN       | -0.739  | 6.14E-21 |
| SYK       | -0.747  | 1.45E-21 |

**Table S4.** List of oligonucleotides used.

| Gene      | Forward Primer (5' - 3')                    | Reverse Primer (5' - 3') |
|-----------|---------------------------------------------|--------------------------|
| FASL      | TCTACCAGCCAGATGCACAC                        | CAGAGGCATGGACCTTGAGT     |
| BCL6      | TGAGAAGCCCTATCCCTGTG                        | CTGGCTTTTGTGACGAAAT      |
| DUSP10    | GCGGCAGTACTTTGAAGAGG                        | GTCATGGTCATCCGAGTGTG     |
| LINC00892 | CTACTGGGCTGGAAGTCAGG                        | CCTCAGGTTCTCCAGTCAGC     |
| PAX5      | QuantiTect Primer Assay QT00021399 (Qiagen) |                          |
| CDKN1A    | GACTCTCAGGGTCGAAAACG                        | GGCGTTTGGAGTGGTAGAAA     |
| IL2       | AACTCACCAGGATGCTCACA                        | GCACTTCCTCCAGAGGTTTG     |
| CD40LG    | QuantiTect Primer Assay QT00000343 (Qiagen) |                          |
| G6PD      | CGTCACCAAGAACATTACG                         | AGGAGATGTGGTTGGACAGC     |
| GUSB      | TTTGCCGATTTTCATGACTGA                       | CCTGGTTTCATTGGCAATCT     |
| MALAT1    | TGGGGGAGTTTCGTAAGT                          | TTTCTCCAGGACTTGGCAGT     |
